1 **Primate anterior insular cortex represents economic decision variables postulated by Prospect theory**

2 **Author list:** You-Ping Yang<sup>1,2</sup>, Xinjian Li<sup>2,3</sup>, Veit Stuphorn<sup>1,2,3\*</sup>

3

4 **Author affiliations:**

5 <sup>1</sup>Department of Psychological and Brain Sciences, Johns Hopkins University, 3400 N. Charles St.,  
6 Baltimore, MD 21218-2685, USA

7 <sup>2</sup>Zanvyl Krieger Mind/Brain Institute, 3400 N. Charles St., Baltimore, MD 21218-2685, USA

8 <sup>3</sup>Department of Neuroscience, Johns Hopkins University School of Medicine and Zanvyl Krieger  
9 Mind/Brain Institute, 3400 N. Charles St., Baltimore, MD 21218-2685, USA

10

11 **Corresponding author and lead contact:**

12 Veit Stuphorn  
13 Johns Hopkins University  
14 338 Krieger Hall  
15 3400 N. Charles St.  
16 Baltimore, MD 21218  
17 USA  
18 Tel: (410) 516-7964  
19 Fax: (410) 516-8648  
20 Email: veit@jhu.edu

21 **Abstract**

22 In humans, risk attitude is highly context-dependent, varying with wealth levels or for different potential  
23 outcomes, such as gains or losses. These behavioral effects are well described by Prospect Theory, with  
24 the key assumption that humans represent the value of each available option asymmetrically as gain or  
25 loss relative to a reference point. However, it remains unknown how these computations are  
26 implemented at the neuronal level. Using a new token gambling task, we found that macaques, like  
27 humans, change their risk attitude across wealth levels and gain/loss contexts. Neurons in their anterior  
28 insular cortex (AIC) encode the 'reference point' (i.e. the current wealth level of the monkey) and the  
29 'asymmetric value function' (i.e. option value signals are more sensitive to change in the loss than in the  
30 gain context) as postulated by Prospect Theory. In addition, changes in the activity of a subgroup of AIC  
31 neurons are correlated with the inter-trial fluctuations in choice and risk attitude. Taken together, we  
32 find that the role of primate AIC in risky decision-making is to monitor contextual information used to  
33 guide the animal's willingness to accept risk.

## 34 Introduction

35 Uncertainty about the possible outcomes of chosen actions is a basic feature of all human and animal  
36 decision making. How our nervous system deals with this uncertainty is therefore a fundamental  
37 question in cognitive neuroscience. Decisions under uncertainty depend on an individual's risk attitude,  
38 i.e., the willingness to accept uncertainty about the outcome (risk) in exchange for possibly better  
39 outcomes than a safer alternative. Risk attitude is strongly influenced by context. Humans show  
40 different risk attitudes when facing risky gains versus risky losses<sup>1</sup>. The abundance of economic  
41 resources in the environment and the current wealth of subjects also modulate an individual's risk  
42 attitude<sup>2-5</sup>. Prospect theory<sup>6</sup>, the most influential<sup>7</sup> and wide-ranging<sup>8</sup> descriptive model of decision-  
43 making under risk, explains these context-dependent changes in risk attitude using two critical concepts  
44 about the cognitive processes underlying value estimation. First, prospect theory assumes that humans  
45 evaluate possible future outcomes either as gains or as losses relative to a reference point (i.e. the  
46 current wealth, resources, or state of the subject). Second, human's sensitivities to changes in value are  
47 different for losses and gains. Specifically, humans are more sensitive to the change of the value of a loss  
48 as compared to a gain (i.e. *losses loom larger than gains*). Thus, humans' choices can be manipulated by  
49 framing an identical outcome as either a gain or loss using verbal instruction, and by varying the current  
50 wealth of subjects that change the point of reference. Despite the success that the prospect theory has  
51 achieved in explaining the risky choices of humans, it remains unclear how the value function across  
52 (gain/loss) contexts, as well as the point of reference are represented in our brain on the neuronal level.

53 Human imaging experiments and lesion studies have identified a network of brain areas that are active  
54 during decision-making under risk<sup>9-14</sup>. Of particular interest is the anterior insular cortex (AIC), a large  
55 heterogeneous cortex in the depth of the Sylvian fissure. Human fMRI studies have suggested a crucial  
56 role of AIC in representing subjects' current internal states<sup>15,16</sup>, and in risk-averse behavior<sup>12,13</sup>. Lesions  
57 in the AIC have also been documented to affect the risk-attitude of human patients<sup>17,18</sup>. Moreover,  
58 recording studies in monkeys have shown that AIC neurons encode reward expectation<sup>19,20</sup>. Based on  
59 these findings, we hypothesized that the AIC neurons may encode behaviorally relevant contextual  
60 information in the framework suggested by prospect theory. AIC would represent the current state of  
61 the subject (the reference point) as well as reference-dependent value signals that differ in loss or gain  
62 context (asymmetrical value functions in loss and gain). Together, these representations in AIC would  
63 influence a subject's risk attitude in decision making.

64 To test this hypothesis, we developed a token-based gambling task and recorded single neuron activities  
65 from the AIC of two macaque monkeys engaged in this task. We first examined whether and how  
66 monkeys changed their risk attitude in various behavioral contexts. Next, we identified AIC neurons  
67 representing factors that influence risk attitude, such as starting token number, gain or loss outcome,  
68 total value of the option, and uncertainty. Finally, we determined whether the AIC neurons encoding  
69 these factors also predict the monkey's choice or risk attitude.

70 We found that monkeys, like humans, have different risk attitudes depending on the gain/loss context,  
71 and that AIC neurons encode reference-dependent value signals, consistent with the asymmetric value  
72 function as postulated by the Prospect theory. In addition, both the monkeys' choices and the activity of  
73 AIC neurons are strongly influenced by the number of tokens that the monkeys possessed at the start of  
74 the trial, indicating that the momentary wealth level served as a reference point. Inter-trial fluctuations  
75 in the activity of AIC neurons encoding these variables were correlated with the monkeys' choices and  
76 risk attitude. Taken together, these results support our hypothesis that the primate AIC encodes the

77 reference point and reference-dependent value signals, and that these value representations of  
78 available options modulate the animal's willingness to accept risk in the current behavioral context.

## 79 **Result**

80 Two monkeys were trained in a token-based gambling task (**Figure 1a**). In this task, the monkey had to  
81 collect a sufficient number of tokens ( $\geq 6$ ) to receive a standard fluid reward (600 $\mu$ l water). Because the  
82 maximum number of tokens that could be earned in a single trial was three, the monkeys had to  
83 accumulate the necessary tokens over multiple trials (**Figure S1**). On each choice trial, the monkey chose  
84 between a gamble option (uncertain outcome) and a sure option (certain outcome), which could result  
85 in gaining or losing tokens. The number of tokens to be won or lost was indicated by the color of the  
86 target cues, while the probability was indicated by the relative proportion of each colored area (**Figure**  
87 **1b**). To investigate whether the monkeys' risk attitude was different for gains and losses, we presented  
88 either only gain or only loss options on any given trial. Thus, in a gain context, the monkey had to choose  
89 between a certain token increase versus an uncertain option that could result in an even larger increase  
90 or no increase at all (**Figure 1b, left**). In the loss context, the monkey had to choose between a certain  
91 loss and an uncertain option that could result in no loss at all or an even larger loss (**Figure 1b, right**).  
92 The monkeys selected the chosen option by making a saccade to the corresponding target cue. After a  
93 short delay (450-550ms), the outcome was revealed, and the number of currently owned tokens (token  
94 assets) was updated. If a trial ended with a token number less than 6 (e.g., 4), these tokens (e.g., 4) were  
95 kept as the start tokens for the next trial. If a trial ended with a token number larger than 6 (e.g., 8),  
96 beside a delivery of water, the remaining tokens (e.g.,  $8-6=2$ ) were rolled over to the start of the next  
97 trial.

98 Both monkeys learned the task, as indicated by the observation that their fixation behavior was strongly  
99 influenced by their token assets. Monkeys fixated faster (**Figure S2a-c**) and were less likely to break their  
100 fixation (resulting in abortion of the trial) (**Figure S2d-f**) when they had larger token assets at the start of  
101 the trial, and when they received more tokens from the previous trial. These results suggest that  
102 monkeys understood the use of tokens as secondary reinforcers, and thus were more motivated when  
103 they owned more and received more tokens, before they actually earned the primary reinforcer (the  
104 fluid reward).

### 105 **Monkeys' risky choices are influenced by gain/loss context and current token assets**

106 We found that monkeys' choices were influenced by the gain/loss context. Both monkeys were more  
107 likely to choose the gamble option than the sure option (**Figure 1c**; t-test; Monkey G,  $P(\text{Gamble})=59\%$ ,  
108  $p < 10^{-4}$ ; Monkey O,  $P(\text{Gamble})=67\%$ ,  $p < 10^{-4}$ ) and were even more likely to do so in the gain context than  
109 in the loss context (**Figure 1c**; paired t-test,  $p < 10^{-4}$  for both Monkey G and Monkey O). We have also  
110 found that monkeys' choices were influenced by the number of tokens they owned at the start of the  
111 trial ('current token assets'), but differently for gains and losses. In the gain context, the probability of  
112 the monkey choosing the gamble option ( $P(\text{Gamble})$ ) decreased as the token assets increased (**Figure 1d**;  
113 green dashed line; regression analysis; Monkey G,  $\beta = -0.044$ ,  $p < 10^{-4}$ ; Monkey O,  $\beta = -0.035$ ,  $p < 10^{-4}$ ). In  
114 contrast, in the loss context  $P(\text{Gamble})$  increased with increasing token assets (**Figure 1d**; red dashed  
115 line; regression analysis; Monkey G,  $\beta = 0.028$ ,  $p < 10^{-4}$ ; Monkey O,  $\beta = -0.001$ ,  $p = 0.8$ ). Thus, as the  
116 monkeys owned more token assets, they became more risk-averse for further gains (i.e., less willing to

117 gamble for a greater win), but were more risk-seeking for avoiding a potential loss. These results are in  
118 line with the observation of humans that human subjects tend to be more risk-averse when facing a  
119 potential gain, and more risk-seeking when facing a potential loss as their own asset increases<sup>1</sup>.

120 Monkeys' response times (RTs, the interval between stimulus onset and the saccade initiation) were also  
121 influenced by these contextual factors. Both monkeys responded slower in the loss context than in the  
122 gain context (Figure S3a-b; permutation test; monkey G:  $RT_{\text{gain}} = 204.79\text{ms}$ ,  $RT_{\text{loss}} = 246.51\text{ms}$ ,  $p < 10^{-3}$ ;  
123 monkey O:  $RT_{\text{gain}} = 175.07\text{ms}$ ,  $RT_{\text{loss}} = 206.00\text{ms}$ ,  $p < 10^{-3}$ ), and when they had more tokens (**Figure S3c-d**;  
124 regression analysis; monkey G:  $\beta_{\text{startTkn}} = 2.83$ ,  $p = 0.19$ ; monkey O:  $\beta_{\text{startTkn}} = 3.50$ ,  $p < 10^{-2}$ ). These suggest  
125 that monkeys chose more carefully when facing a potential loss, and when they are getting closer to 6  
126 tokens for the water reward. Other factors that impacted RTs will be discussed in later sections (**Figure**  
127 **S3e-h**).

128 The fact that monkeys' risk preference changed across contexts suggests that they evaluate each  
129 available option not depending on the final status (the final token number), but rather how the current  
130 status will be changed (by gaining or losing tokens). Thus, the monkeys showed a framing effect<sup>21</sup>. This is  
131 clearly demonstrated by contrasting trials with the same outcome in terms of final token number, but  
132 which resulted from either gaining or losing tokens (**Figure 1e**; paired t-test; monkey G & O:  $p < 10^{-2}$  for  
133 all end token numbers, except end token numbers 2&5 for monkey G, and number 5 for monkey O).  
134 Monkeys chose more gambles when a given prospect (end state) was offered as a gain, compared to  
135 when it was offered as a loss.

### 136 **Prospect theory model of risk-attitude adjustment**

137 After confirming that monkeys' choice behavior was influenced by core contextual factors critical for  
138 prospect theory (PT), we used this model to describe choice behavior (**Figure 1**). The key component of  
139 the PT model is to weight gains, losses, and probabilities differently before they are combined to form a  
140 subjective evaluation of the option. The relative gains and losses are mapped onto corresponding  
141 subjective utility as follows:  $u(x) = x^\alpha$  when  $x > 0$  (reward outcome in gain) and  $u(x) = -\lambda * (-x)^\alpha$  when  $x < 0$   
142 (reward outcome in loss). The utility function component  $\alpha$  captures risk-attitude. Convex utility (with  $\alpha$   
143  $> 1$ ) indicates risk-seeking, while subjects are more sensitive to differences in larger rewards. Concave  
144 utility (with  $\alpha < 1$ ) indicates risk-averse, while subjects exhibit diminishing marginal sensitivity. The  
145 utility function component  $\lambda$  captures loss-aversion, the idea that losses loom larger than equivalent  
146 gains.  $\lambda > 1$  indicates more sensitivity to losses than gains and  $\lambda < 1$  indicates more sensitivity to gains  
147 than losses.

148 To capture the influence of tokens on different components, we modeled behavior for each start token  
149 number independently. In the gain context, both monkeys were risk-seeking ( $\alpha > 1$ ) when the start  
150 token number was low, but they became risk neutral or risk-averse when the start token number  
151 increased (**Figure 1g**; light to dark green lines indicate increasing start token number). Estimated  $\alpha$  was  
152 negatively modulated by the start token number (regression analysis; Monkey G,  $\beta = -0.16$ ,  $p < 10^{-4}$ ;  
153 Monkey O,  $\beta = -0.14$ ,  $p < 10^{-4}$ ). In monkey G, the utility functions were consistently steeper for losses than  
154 for gains (**Figure 1g**; yellowish to red lines indicate increasing start token number; t-test:  $\lambda > 1$ ; Monkey

155 G,  $p < 10^{-4}$  for all start token numbers). Thus, monkey G showed loss-aversion. However, in monkey O the  
156 utility functions were not consistently steeper for losses than for gains and  $\lambda$  values varied around 1. This  
157 indicated that monkey O was equally sensitive to gains and losses and thus showed no loss aversion.  
158 There was no significant difference for the estimated  $\lambda$  across different start token numbers for either  
159 monkey (regression analysis; Monkey G,  $\beta = 0.03$ ,  $p = 0.69$ ; Monkey O,  $\beta = 0.01$ ,  $p = 0.4$ ).

160 Objective probabilities are mapped onto a subjective weighting function as follows:  $w(p) = p^\gamma / (p^\gamma + (1-p)^\gamma)^{1/\gamma}$ .  $\gamma > 1$  indicates an S-shape subjective probability mapping (overestimated for large probabilities  
161 and underestimated for small probabilities),  $\gamma < 1$  indicates an inverse S-shape subjective probability  
162 mapping (underestimated for large probabilities and overestimated for small probabilities), and  $\gamma = 1$   
163 indicate a linear mapping of objective probabilities. Both monkeys showed an inverse S-shaped mapping  
164 of probabilities (**Figure 1h**; t-test:  $\gamma < 1$ ; both monkeys,  $p < 10^{-4}$  for all start token numbers). The mappings  
165 were slightly influenced by increasing start token numbers in one monkey (light blue to dark blue lines;  
166 regression analysis; Monkey G,  $\beta = 0.02$ ,  $p < 10^{-4}$ ) and not at all in the other one (Monkey O,  $\beta = 0.0004$ ,  $p$   
167  $= 0.89$ ).

169 After calculating the subjective value ( $SV = u(x) * w(p)$ ) of each option based on prospect theory, we  
170 estimated the P(Gamble) by passing subjective value difference between options ( $\Delta SV$ ) through a  
171 softmax function with parameters  $s$  and  $bias$ :  $P(\text{Gamble}) = 1 / (1 + e^{-s(\Delta SV - bias)})$ , where  $s$  controls choice  
172 stochasticity and  $bias$  represents the tendency to choose the gamble option independent of the value  
173 calculation process. The monkeys showed a consistent tendency to choose the gamble option (**Figure 1i**;  
174 leftward shift of the choice function in; t-test: both monkeys,  $p < 10^{-4}$  for all start token numbers). This  
175 tendency decreased when the start token number increased (**Figure 1i**; light gray to black lines;  
176 regression analysis; Monkey G,  $\beta = 0.32$ ,  $p < 10^{-4}$ ; Monkey O,  $\beta = 0.28$ ,  $p < 10^{-4}$ ), indicating monkeys  
177 became less risk-seeking as their wealth levels increased. Moreover, the choice functions became  
178 steeper, that is monkeys' choices became less stochastic, when the start token number increased for  
179 both monkeys (regression analysis; Monkey G,  $\beta = 0.23$ ,  $p < 10^{-4}$ ; Monkey O,  $\beta = 0.22$ ,  $p < 10^{-4}$ ). This result,  
180 combined with the token effect on response time, indicates that choices became slower but less  
181 stochastic when token assets increased, which suggests a speed-accuracy tradeoff.

182 In sum, the PT model describes the behavioral result well (**Figure 1c-d**) and predicts the monkeys'  
183 choices better than the expected value model that does not assume nonlinearity in subjective utility and  
184 probabilities (**Figure S3**). This was also true after taking into account the different number of free  
185 parameters (see quantitative model evaluation in **Table 1**). This suggests that key components of the  
186 prospect theory model are important for explaining the monkeys' behavior in our task.

### 187 **Anterior Insula neurons encode decision-related variables that influence risk-attitude**

188 To determine the neuronal basis underlying prospect theory, we recorded 240 neurons in the AIC of two  
189 macaque monkeys (monkey G: 142 neurons; monkey O: 98 neurons) working in the token gambling task.  
190 The recording locations are shown in **Figure 2a** (more details in **Figure S5**). We analyzed the neuronal  
191 activity in the choice period (i.e., the time from target onset to saccade initiation) to determine if AIC  
192 neurons carried signals that could influence decision making. We began by analyzing activity during non-

193 choice trials, in which only one option was presented. In general, the AIC neurons showed weak spatial  
194 selectivity. Only 7% (17/240) of all AIC neurons showed a significant effect of spatial location on  
195 neuronal activity (1-way ANOVA,  $p < 0.05$ ). We therefore ignored spatial target configuration for the  
196 remaining analysis.

197 To quantitatively characterize the variables that each AIC neuron encodes during the choice period, we  
198 examined the activity of each neuron using a series of linear regression models with all potential  
199 combinations of 3 basic variables (token assets, value, and risk) and a baseline term. This resulted in 8  
200 families of models. Within each family, a basic variable could be represented by varying numbers of  
201 specific instantiations (3 forms of token-encoding, 5 forms of value-encoding, 2 forms of risk-encoding).  
202 This resulted in a total of 162 tested models, including a model that included only a baseline term (for  
203 details see Methods). For each neuron, we identified the best fitting model using the Akaike information  
204 criterion and classified it into different functional categories according to the variables that were most  
205 likely encoded by the neuronal activity.

206 The vast majority of recorded AIC neuron activity (146/240; 61%) encoded at least one decision-related  
207 variable (task-related neurons:  $p < 0.05$  for the coefficient of a specific variable in the best-fitting  
208 multiple linear regression mode; **Figure 2b**, more details in **Table 1**). Among these task-related neurons,  
209 78 neurons (33%) carried gain/loss-modulated value signals, 109 neurons (45%) carried token signals, 19  
210 neurons (8%) carried risk signals, and 9 neurons (4%) carried an absolute value signal. A substantial  
211 number of AIC neurons (53/146; 36%) showed mixed selectivity and encoded more than one decision-  
212 related variable. The distributions of neural type classification were similar across the two monkeys  
213 (**Table S1**).

214 A large group of AIC neurons reflected information about the expected value of the options (value-  
215 encoding neurons). A subset of this group of AIC neurons, carrying a *Linear value signal* (example neuron  
216 in **Figure 2c**), encoded the expected value of all options in a monotonically rising ( $n=13$ ) or falling ( $n=1$ )  
217 fashion, for both gains and losses. This kind of value signal is not gain/loss context sensitive. However,  
218 we found neuronal activity of other subsets of value-encoding neurons that varied largely as a function  
219 of the way they represented value across the Gain and the Loss context (**Figure 2d-e**). One group of  
220 these value-encoding neurons carried a binary *Gain/Loss signal* (**Figure 2d**) that categorized each option  
221 as gain or loss, regardless of the expected value. In addition, we found AIC neurons that represented  
222 value in both the gain and loss context, but with inverse correlations of neural activity and value (**Figure**  
223 **2e**). These neurons likely carried a *Behavioral salience signal*. Most interestingly, we found two other  
224 groups of AIC neurons carrying *Loss value* (**Figure 2f**) or *Gain value signals* (**Figure 2g**), respectively.  
225 These neurons represented a value signal, but only in either the loss or the gain context. We  
226 encountered more Loss value neurons ( $n=29$ ) than Gain value neurons ( $n=4$ ). The larger number of  
227 neurons encoding Loss value fits with human neuroimaging findings that suggest a role for the anterior  
228 insula in encoding aversive stimuli and situations<sup>1,13</sup>.

229 The largest proportion of AIC neurons reflected information about the currently owned token number.  
230 These token-encoding neurons used three different frameworks for encoding token assets. The first



231 group carried a *Linear token signal* (**Figure 2h**). These AIC neurons monotonically increased (n=11) or  
232 decreased (n=2) their activity with the number of token assets. The second group carried a *Binary token*  
233 *signal* (**Figure 2i**). These AIC neurons categorized all possible token numbers into a high [3, 4, 5] and a  
234 low [0, 1, 2] token level. Likely, this reflects a fundamental distinction between a ‘low’ token level, for  
235 which it is impossible that the monkey will earn reward at the end of the current trial (because the  
236 monkey can only earn a maximum of 3 tokens in one trial), and a ‘high’ token level that makes it  
237 possible to earn a reward in the current trial. The third, and largest, group carried a *Numerical token*  
238 *signal*. These AIC neurons are number-selective and are tuned for a preferred number (here four,  
239 example neuron in **Figure 2j**). We used a Gaussian function to fit this activity pattern. The AIC neurons  
240 carrying a Numerical token signal covered the entire scale from 0-5 tokens with some neurons having  
241 each of the possible token amounts as their preferred number.

242 Based on human neuroimaging data<sup>22,23</sup>, it has been suggested that the anterior insular cortex encodes  
243 the riskiness of options. We tested therefore if AIC neurons encoded risk-related signals. Here risk was  
244 defined as outcome variance. We found some AIC neurons (n=9) carrying a *Linear risk signal* (**Figure 2k**)  
245 that encoded the risk of the various options across both the gain and loss context in a parametric  
246 fashion. We also found another group of AIC neurons (n=10) encoding a *Binary risk signal* that  
247 categorized options into safe or uncertain. More details of distribution of type of neuron can be found in  
248 **Table 2** and **TableS2**.

249 In the analysis so far, we have used a relative framework for value. Expected value was defined as token  
250 changes relative to a reference point (the start token number). However, value could also be defined in  
251 an absolute framework (i.e., the final token number at the end of the trial). Such an absolute value  
252 framework is arguably better suited for capturing the interest of the monkey in ascertaining how close  
253 he is to collecting 6 tokens and reaping a reward. We tested for AIC neurons that represented expected  
254 absolute value, which is the expected end token number weighted by the probability of each outcome.  
255 However, we found only a very small number (9/240; 4%) carrying an *End token signal* (**Figure 2l**).

256 A significant number of AIC neurons showed activity pattern that matched several predictions of  
257 prospect theory. First, we found that many AIC neurons encode the wealth level of the monkey, i.e. the  
258 token number at the start of the trial. Within the context of our task, this variable represented the  
259 reference point relative to which the gain or loss options are measured. Simultaneously, this variable  
260 also indicates the current state of progress and indicates how close the monkey is to achieving the next  
261 reward. Second, many other AIC neurons reflect in their activity whether the offer is a gain or a loss.  
262 Some of them encoded the context, i.e., whether the options were presented in the gain or loss context.  
263 Other neurons represented a gain/loss-specific value signal in a parametric manner exclusively. Third,  
264 only very few neurons encode expected absolute value. Taken together, these three findings strongly  
265 imply that the primate AIC uses a relative value encoding framework, anchored to a reference point that  
266 reflects the current state of the monkey, as suggested by prospect theory.

267 **Value-encoding neurons in AIC exhibited contextual modulation predicted by the Prospect theory**

268 The majority of value-encoding AIC neurons were context-modulated (**Figure 2d-g**). A strong assumption  
269 of Prospect theory is that changes in relative value are not encoded symmetrically across gains and  
270 losses. Indeed, the monkeys' behavior indicated that they were more sensitive to objective value  
271 differences in the loss than the gain context (i.e. steeper utility functions in the loss than that in gain  
272 context in **Figure 1g**). We therefore investigated whether and how value signals across the AIC  
273 population showed matching differences in their sensitivity for gains and losses. We examined the  
274 absolute value of the standardized regression coefficients (SRC) of Loss-Value Neurons in the loss  
275 context and that of Gain-Value Neuron in the gain context. At the population level, we found indeed  
276 that Loss value signals and Gain Value signals had different sensitivities to changes in value. Specifically,  
277 the normalized  $|SRC|$  of Loss-Value Neurons in the loss context were larger than that of Gain-Value  
278 Neuron in the gain context (**Figure 3a**, permutation test; mean of  $|SRC_{loss}| = 2.978$ , mean of  $|SRC_{gain}| =$   
279  $2.058$ ,  $p = 0.054$ ; unsigned SRC for losses and gains were indicated in red and green, respectively). This  
280 suggests that the AIC neurons encoding value signals were more sensitive to increasing loss than  
281 increasing gain (**Figure 3b**).

282 Moreover, the sensitivity of value change in gain or loss context were also influenced by the wealth level.  
283 Normalized  $|SRC|$  of Loss-Value Neurons in the loss context became smaller as the wealth level  
284 increased (**Figure 3c**, left; permutation test; mean of  $|SRC_{loss}|$  in low wealth level = 3.49, mean of  
285  $|SRC_{loss}|$  with high wealth level = 2.47,  $p = 0.017$ ; unsigned SRC in the loss context for low or high wealth  
286 levels were indicated in orange and red, respectively). Normalized  $|SRC|$  of Gain-Value Neurons in the  
287 gain context also became smaller as the wealth level increased. However, this trend did not reach a  
288 significant level (**Figure 3c**, right; permutation test; mean of  $|SRC_{gain}|$  in low wealth level = 2.38, mean of  
289  $|SRC_{gain}|$  in high wealth level = 2.06,  $p = 0.29$ ; unsigned SRC in gain context in low or high wealth levels  
290 were indicated in light and dark green, respectively). Again, this wealth level-sensitive effect on AIC  
291 value coding (**Figure 3d**) is consistent with the fact that monkeys became less sensitive to objective  
292 value change when the wealth level increased (i.e., utility functions became flatter in both the loss and  
293 gain context when the wealth level increased; **Figure 1g**).

#### 294 **Choice probability of AIC neurons predict the internal states related to behavioral choices**

295 The gain/loss-specific value signals and the wealth level signals in AIC were present before the choice  
296 was made and were therefore in a position to influence the monkey's decisions. To determine whether  
297 neural activity of the AIC neurons correlates with choice behavior, we computed a receiver operation  
298 characteristic (ROC) for each cell, and then computed the area under the curve (AUC) as a measure of  
299 the cell's discrimination ability. In this analysis, an AUC value significantly different from 0.5 indicates at  
300 least a partial discrimination between two conditions. For each AIC neuron, we calculated two AUC  
301 values. First, we compared the firing rate distributions on choice trials when the monkey chose the  
302 gamble versus the sure option. We used this AUC value as a measure of *choice probability*. Second, we  
303 compared the firing rate distributions on choice trials when the monkey was risk-seeking versus risk-  
304 avoiding. We used this AUC value as a measure of *risk-attitude probability*. Risk-seeking trials were  
305 defined as trials where the monkey chose the gamble, even when the expected value of the gamble  
306 option was smaller than the expected value of the sure option. We did not include trials, in which the

307 monkey chose the gamble option and it had a higher expected value, because in that case the monkey's  
308 choice did not give any indication about his risk-attitude at that moment. Conversely, risk-avoiding trials  
309 were defined as trials where the monkey chose the sure option, even so it had a lower expected value  
310 than the gamble option. Thus, trials used to compute the risk-seeking probability were the subset of the  
311 trials used to compute choice probability, in which the monkeys did not make choices that maximized  
312 the expected value of the chosen option.

313 We found that trial-by-trial fluctuations in the activity of a subset of AIC neurons (35/240; 15%)  
314 significantly correlated with fluctuations of choice or risk-attitude. As shown in **Figure 4**, 19 neurons (8%)  
315 showed a significant choice probability (green), 20 neurons (8%) showed significant risk-attitude  
316 probability (purple), and 4 neurons (2%) showed both significant choice probability and risk-attitude  
317 probability (black). Across the AIC population (n=240), the ability of neural activity to predict choice and  
318 risk attitude showed a strong positive correlation (Pearson correlation;  $r = 0.41$ ,  $p < 10^{-4}$ ).

319 AIC neurons encode contextual information that influence monkeys' choice and momentary risk-  
320 attitude, such as current wealth level, gain/loss, and the value of each option (**Figure 2**). It is therefore  
321 not surprising that the activity of many of these neurons is predictive of choice or risk-taking. We  
322 examined whether neurons encoding specific-variables were particularly predictive of choice or risk-  
323 attitude (**Figure S6**). However, a chi-square test showed no significant dependency between the  
324 encoding of a specific decision-related variable and the likelihood that choice-predictive and/or risk-  
325 attitude-predictive signals were carried by a given AIC neuron (**Table3**,  $\chi^2 = 7.61$ ,  $p = 0.67$ , excluding  
326 neurons with AUROC that predict neither choice nor risk-attitude).

## 327 Discussion

328 Prospect theory provides profound insights into how humans make risky decisions in a wide range of  
329 circumstances<sup>6,24</sup>. The behavioral hallmarks described by the theory have also been reported in old- and  
330 new-world monkeys, as well as in rats<sup>25-28</sup>. This suggests that the neural circuits responsible for making  
331 risky decisions may have been evolutionarily conserved across mammals. Using a token-based gambling  
332 task, we demonstrated that activity of AIC neurons in macaques exhibits critical characteristics  
333 consistent with those postulated by Prospect Theory. Decoding the activity from a subgroup of AIC  
334 neurons can predict the monkey's choices and risk attitude on a trial-by-trial basis. These results suggest  
335 that the AIC is a pivotal part of a circuit monitoring state and context information that controls risky  
336 choices by modifying activity in downstream decision processes.

337 Overall, monkeys in the present study were more prone to choose gamble options (**Figure. 1c**). This is in  
338 line with similar findings of previous monkey experiments<sup>25,26,29,30</sup>, yet is inconsistent to most human  
339 studies<sup>6,24,31,32</sup>. It is unclear whether such a discrepancy between humans and monkeys was due to  
340 species-specific differences, individual variability, or task design. Macaques have been shown to be risk-  
341 averse, like humans, in a foraging task<sup>33</sup> and in a risky decision-making task using animals' hydration  
342 state to index their non-monetary wealth level<sup>3</sup>. The observed tendency to choose gamble options was  
343 therefore likely due to task-specific factors, such as the small reward amount at stake and the large  
344 number of trials.

345 Insular cortex is a large heterogeneous cortex that is typically divided into posterior granular,  
346 intermediate dysgranular, and anterior agranular sectors, based on cytoarchitectural differences. Our  
347 recordings were concentrated in the most anterior part of the insula and encompassed mostly agranular  
348 and some dysgranular areas (**Figure S4**). In addition, we also recorded some neurons in the border  
349 regions of the adjacent gustatory cortex. Importantly, we found no functional segregation or gradient  
350 with respect to the functional signals that were represented across the different cortical areas, we  
351 explored. This fits with a recent primate neuroimaging study that showed strong activation of this entire  
352 region by visual cues indicating reward, as well as reward delivery<sup>20</sup>. Insula has long been known to be  
353 strongly connected with the neighboring gustatory cortex<sup>34,35</sup>. Recently, several lines of studies have  
354 demonstrated that neurons in the gustatory cortex not only engage the primary processing of gustatory  
355 inputs, but also involve multisensory integration<sup>15,16</sup>, as well as higher cognitive functions like decision-  
356 making<sup>13,35</sup>. This suggests that primate insular cortex and the neighboring gustatory cortex are strongly  
357 interconnected and form an interacting distributed network during decision making.

358 Prospect theory assumes that people make decisions based on the potential gain or losses relative to a  
359 reference point. In our experiment, the natural reference point against which the monkey compared  
360 possible outcomes was the current token assets. Consistent with this idea, we found that the activity of  
361 a substantial number of AIC neurons (109/240; 45%) encoded start token number. The AIC has been  
362 suggested to represent the current physiological state of the subject (i.e., interoception)<sup>15,16,36,37</sup>. Our  
363 findings suggest that AIC also encodes more abstract state variables, such as current wealth level, which  
364 are important for economic decisions that will influence future homeostatic state. Notably, we found  
365 some AIC neurons encode the start token number in a numerical scale, with their activity increased (or  
366 decreased) specifically when the monkey owned a particular number of tokens. Such a pattern of  
367 numerical encoding has been identified in primate prefrontal and parietal cortex<sup>38,39</sup>, medial temporal  
368 lobe<sup>40</sup>, and recently in AIC<sup>41</sup>. It would be interesting for future studies to investigate whether these  
369 number-tuned neurons relate to the numerical abilities of primates.

370 Our results overwhelmingly support the notion that value-related signals in the brain operate in a  
371 relative framework. Only 4% of neurons in the AIC carried a value signal in an absolute framework.  
372 However, how the value of options is represented in a relative framework is an issue under debate. The  
373 core of the debate regards whether the value of gains and losses are represented in a single unitary  
374 system<sup>42</sup> or separately by two independent systems<sup>43-45</sup>. Some of the AIC neurons encoding a parametric  
375 value signal did continuously across gains and losses (14/47; 30%). However, most AIC neurons encoded  
376 gain or loss-specific value signal (33/47; 70%). Thus, while there is some evidence for both hypotheses,  
377 most AIC value-encoding neurons form two independent representations that encode gains or losses,  
378 respectively. This functional separation is further supported by the presence of a large number of  
379 neurons carrying a categorical gain/loss signal. Interestingly, the number of loss-encoding neurons  
380 (29/33; 88%) is much larger than the number of gain-encoding AIC neurons (4/33; 12%). This may  
381 explain why human imaging studies often find a link between the AIC and the anticipation of aversive  
382 outcomes<sup>1,13</sup>. Thus, the AIC recordings show the presence of separate neuronal populations that encode  
383 value as a relative gain or loss. This could be the neuronal underpinning of the separate utility functions  
384 used in prospect theory.

385 'Risk' is often formalized and quantified as the outcome variance, and the AIC has been implicated to  
386 play a role in monitoring risk<sup>22,23</sup>. In line with this, we found 8% of the AIC neurons (n=19/240) whose  
387 activity correlates with the outcome variance. Moreover, the trial-by-trial variability of the monkeys'  
388 choice and risk attitude was correlated with activity changes in a subgroup of AIC neurons (**Figure 6**). All  
389 of this supports the hypothesis that AIC plays an important part in the process of decision making under  
390 risk.

391 To the best of our knowledge, this is the first study recording single neurons of the AIC in awake,  
392 behaving primates during risky decision-making. We interpreted the function of AIC from the  
393 perspective of economic, risky decisions<sup>13</sup> and within the framework of Prospect theory<sup>6</sup>. Decisions are  
394 likely not only guided by the rational, abstract processes depicted by economic models, but are strongly  
395 influenced by emotional processes<sup>46</sup>. The AIC has been suggested to occupy a central position in  
396 regulating emotions as it receives interoceptive afferents from visceral organs through the posterior  
397 granular insula area, representing contextual information (as demonstrated by this study), and is closely  
398 connected with the amygdala and autonomic nuclei<sup>15,47</sup>. This study took the first step to delineate how  
399 the decision context modulates economic value representation, and thereby impacts the decision of  
400 subjects. Future work will further investigate the interacting functions of AIC in economic decisions,  
401 emotions, and autonomic regulation.

## 402 **Materials and Methods**

403 All animal care and experimental procedures were conducted in accordance with the US public Health  
404 Service policy on the humane care and use of laboratory animals and were approved by the Johns  
405 Hopkins University Institutional Animal Care and Use Committee (IACUC).

### 406 **General**

407 Two male rhesus monkeys (Monkey G: 7.2 kg, Monkey O: 9.5 kg) were trained to perform a token-based  
408 gambling task in this study. Monkeylogic software<sup>48</sup> (<https://www.brown.edu/Research/monkeylogic/>)  
409 was used to control task events, stimuli, and reward, as well as monitor and store behavioral events.  
410 During the experimental sessions, the monkey was seated in an electrically insulated enclosure with its  
411 head restrained, facing a video monitor. Eye positions were monitored with an infrared corneal  
412 reflection system, EyeLink 1000 (SR Research) at a sampling rate of 1000 Hz. All analyses were  
413 performed using self-written Matlab code, unless noted otherwise.

### 414 **Behavioral tasks**

415 The token-based gambling task was based on a previously published task design<sup>49</sup> and consisted of two  
416 types of trials: choice trials and force choice trials. In choice trials, two targets (both a sure option and a  
417 gamble option) were presented on the screen. Monkeys were allowed to choose one of the options by  
418 making a saccade to the corresponding target. Choice trials allowed us to measure the monkey's risk  
419 attitude in different behavioral contexts of various value-matching of gamble and sure. In force choice  
420 trials, only one target (either a sure option or a gamble option) was presented on the screen so the  
421 monkey was forced to make a saccade to the given target. Comparing the neuronal activity in choice and  
422 force choice trials allowed us to identify neuronal signals specifically related to decision-making. The  
423 choice and force choice trials were pseudo-randomly interleaved in blocks so that each block consisted  
424 of all 24 choice trials and 13 force choice trials.

425 A choice trial began with the appearance of a fixation point surrounded by the token cue. After the  
426 monkey had maintained its gaze at the central fixation point ( $\pm 1^\circ$  of visual angle) for a delay period (0.5-  
427 1s), two choice targets were displayed on two randomly chosen locations among the four quadrants on  
428 the screen. The monkey indicated its choice by shifting gaze to the target. Following the saccade, the  
429 token cue moved to surround the chosen target and the unchosen target disappeared from the screen.  
430 The monkey was required to keep fixating the chosen target for 450-550ms, after which the chosen  
431 target changed either color or shape. If the chosen target was a gamble option, it changed from a two-  
432 colored square to a single-colored square to indicate the outcome of the gamble. The color represented  
433 the amount of gained or lost tokens in the present trial. If the chosen target was a sure option, the  
434 shape changed from a square to a circle serves as a control to the change in visual display that occurs  
435 during gamble option choices. Finally, after an additional delay (500ms) the token cue was updated. If  
436 the owned token number was equal to or more than 6 at this stage, the monkey received a standard  
437 fluid reward after an additional 450ms waiting time. At the beginning of the next trial, the remaining  
438 tokens were displayed with filled circles. Otherwise, if the owned token number was smaller than 6, the

439 monkey did not receive a fluid reward and the updated token cue was displayed at the beginning of the  
440 next trial. If the owned token number was smaller than 0, the inter-trial-interval (ITI) for the next trial  
441 would be prolonged (300 ms per owed token).

442 The monkey was required to maintain the fixation spot until it disappeared for reward delivery. If the  
443 monkey broke fixation in either one of the two time periods, the trial was aborted and no reward was  
444 delivered. The following trial repeated the condition of the aborted trial contingent on the time of  
445 fixation break. A trial in which the monkey broke fixation *before* the choice was followed by a trial in  
446 which the same choice targets were presented, but at different locations. This ensured that the monkey  
447 sampled every reward contingency evenly but could not prepare a saccade in advance. On the other  
448 hand, a trial in which the monkey broke fixation *after* the choice was followed by a no-choice trial in  
449 which only the chosen target was presented. If the monkey broke fixation following a gamble choice,  
450 but before the gamble outcome was revealed, the same gamble cue was presented. If the monkey broke  
451 fixation following a sure choice or after a gamble outcome was revealed, the same sure cue was  
452 presented. This ensured that the monkey could not escape a choice once it was made and had to  
453 experience its outcome. All trials were followed by a regular 1500-2000ms ITI. The schedule of the  
454 token-based gambling task is shown in **Figure 1a**.

455 All options in this task were represented by sets of colored squares, with the color of the square  
456 indicating the token amount that could be gained or lost (token outcome) and the proportion of color  
457 indicating the probability that this event would take place (outcome probability) (**Figure 1b**). The sure  
458 options were single-colored squares indicating a certain outcome (gain or loss of token). There were 7  
459 different colors used for sure options representing the number of tokens that were gained or lost ([-3, -2,  
460 -1, 0, +1, +2, +3]). The gamble options were two-colored squares indicating two possible outcomes  
461 indicated by two different colors. The portion of each color corresponded to the probability of each  
462 outcome. Six gamble options were used in this task. Three of the gambles resulted in either a gain of 3  
463 or 0 token(s), but with different outcome probabilities (i.e. token [+3, 0] with the probability  
464 combination of [0.1, 0.9], [0.5, 0.5], or [0.75, 0.25]). Another three gambles resulted either in a loss of 0  
465 or 3 token(s) with different outcome probability (i.e. token [0, -3] with probability combination of [0.1,  
466 0.9], [0.5, 0.5], or [0.75, 0.25]). The choice trials were divided into a gain context and a loss context  
467 (**Figure 1b**). In the gain context, the three gamble options that resulted in either a gain of +3 or 0 token  
468 with different outcome probabilities were paired with four sure options that spanned the range of  
469 gaining outcomes (i.e. [0, +1, +2, +3]). These resulted in 12 possible combinations of sure and gamble  
470 options. In the loss context, the other three gamble options resulted either in a loss of 3 or 0 with  
471 probability combination were paired with four sure options that spanned the range of losing outcomes  
472 (i.e. [0, -1, -2, -3]). Thus, there were another 12 possible combinations of sure and gamble options. This  
473 resulted in a total of 24 different combinations of reward option combinations (half in the gain context  
474 and the other half in the loss context) that are offered in choice trials. In the force choice trials, all 13  
475 different reward options (7 sure and 6 gamble options) which were used in the choice trials are  
476 presented in isolation.

477 **Saccade detection**

478 Eye movements were detected offline using a computer algorithm (saccade detection function) that  
479 searched first for significantly elevated velocity ( $30^\circ/s$ ). Saccade initiations were defined as the beginning  
480 of the monotonic change in eye position lasting 15ms before the high-velocity gaze shift. A valid saccade  
481 for choice was further admitted to the behavioral analysis if it started from the central fixation window  
482 ( $1^\circ \times 1^\circ$  of visual angle) and ended in the peripheral target window ( $2.5^\circ \times 2.5^\circ$  of visual angle).

### 483 **Description of monkeys' behavior**

484 Fixation behavior: We examined whether and how monkeys' motivations to initiate a new trial were  
485 influenced by the outcome of the previous trial and the start token number of the current trial. We used  
486 two behavioral signals as indications of the monkey's motivational state: (1) fixation latency (i.e., the  
487 time from fixation point onset until fixation by the monkey) and (2) fixation break ratio (i.e., the  
488 frequency with which the monkey failed to fixate on the fixation point long enough to initiate target  
489 onset). We used linear regression models to test if there was a significant relationship between each of  
490 the two variables describing motivational state and the variables describing history and current state.

491 Response time: We examined whether and how response times were influenced by different decision-  
492 related variables. For each trial, response time was defined as the time period between target onset  
493 and saccade initiation estimated by the saccade detection function. The response time dataset in each  
494 condition (e.g. trials from context of gain or loss, trials with different start token numbers, trials with  
495 different expected values of chosen option (chosen EV), or trials with different absolute values of  
496 difference of expected values among the gamble and sure option ( $|\Delta EVgs|$ )) was fitted with an ex-  
497 Gaussian distribution algorithm<sup>50</sup> (<https://doi.org/10.6084/m9.figshare.971318.v2>). It returned three  
498 besting-fitting parameter values of the ex-Gaussian distribution: the mean  $\mu$ , the variance  $\sigma$ , and the  
499 skewness  $\tau$  of the distribution. We used a permutation test to determine if the mean RTs of trials from  
500 the gain and loss context. We used linear regression models to test whether there was a significant  
501 relationship between mean RTs and start token number, chosen EV, or  $|\Delta EVgs|$ .

### 502 **Prospect theory model**

503 Prospect theory is derived from classical expected value theory in economics<sup>51</sup> and assumes that the  
504 subjective value of a gamble depends on the utility of the reward amount that can be earned, weighted  
505 by the 'subjective' estimation of the probability of the particular outcome. Both the utility function and  
506 the probability function can be non-linear and thus might influence risk preference.

507 We modeled the probability that monkeys chose the gamble option by a softmax choice function whose  
508 argument was the difference between the subjective values of each option.

509 Subjective utility was parameterized as:

$$510 \quad u(x) = \begin{cases} x\alpha, & \text{for } x > 0 \\ -\lambda(-x)\alpha, & \text{for } x < 0 \end{cases} \quad (1)$$

511 where  $\alpha$  is a free parameter determining the curvature of the utility function,  $u(x)$ , and  $x$  is the reward  
512 outcome (in units of gaining or losing token numbers).

513 Subjective probability of each option is computed by:



514 
$$w(p) = \frac{p^\gamma}{(p^\gamma + (1-p)^\gamma)^{1/r}} \quad (2)$$

515 where  $\gamma$  is a free parameter determining the curvature of the probability weighting function,  $w(p)$ , and  $p$   
 516 is the objective probability of receiving corresponding outcome. The  $u(x)$  and  $w(p)$  were followed with  
 517 research<sup>2,6</sup>.

518 The subjective value (SV, or say expected utility) of each option was computed by combining the output  
 519 of  $u(x)$  and  $w(p)$  that map objective gains and losses relative to the reference point and objective  
 520 probability onto subjective quantities, respectively:

521 
$$SV_{gamble} = u(x_{win}) \times w(p_{win}) + u(x_{loss}) \times w(1 - p_{win}) \quad (3)$$

522 
$$SV_{sure} = u(x) \times w(1) \quad (4)$$

523 The subjective value difference between the two options was then transformed into choice probabilities  
 524 via a softmax function with terms of slope  $s$  and bias  $s$ :

525 
$$P(Gamble) = \frac{1}{1 + e^{-s(\Delta SV - bias)}} \quad (5)$$

526 where  $\Delta SV = SV_{gamble} - SV_{sure}$ ,  $s$  determines the sensitivity of choices to the  $\Delta SV$ , and  $bias$  is the  
 527 directional bias of choosing gamble.

528 For an alternative expected value (EV) model, the value of option is calculated as:

529 
$$EV_{gamble} = x_{win} \times p_{win} + x_{loss} \times (1 - p_{win}) \quad (6)$$

530 
$$EV_{sure} = (x) \times (1) \quad (7)$$

531 The expected value difference between the two options was then transformed into choice probabilities  
 532 via a softmax function with terms of slope  $s$  and bias  $s$  as what we did in the PT model:

$$P(Gamble) = \frac{1}{1 + e^{-s(\Delta EV - bias)}}$$

533 where  $\Delta EV = EV_{gamble} - EV_{sure}$ ,  $s$  determines the sensitivity of choices to the  $\Delta SV$ , and  $bias$  is the  
 534 directional bias of choosing gamble.

535 We optimized model parameters,  $\alpha$ ,  $\lambda$ ,  $\gamma$  in the PT model, and  $s$  and  $bias$  in both PT and EV models by  
 536 minimize the negative log likelihoods of the data given different parameters setting using Matlab's  
 537 `fmincon` function, initialized at multiple starting points of the parameter space as follows:

$$0 < \alpha, \lambda, \gamma < 5,$$

$$-10 < bias < 10$$

$$0 < s < 20$$

538 -2 negative log-likelihoods ( $-2 * LL_{max}$ , which measures the accuracy of the fit) were used to compute  
 539 classical model selection criteria. We also computed the Bayesian information criterion (BIC):

$$BIC = \log(n) * df + 2 * LL_{max}$$

540 where  $n$  is the number of training trial and  $df$  is the number of free parameters in the model. The  
541 likelihood in BIC is penalized by adding more parameters into the model. Thus, we use BIC to represent  
542 the trade-off between model accuracy and model complexity and use it to guide model selection. We  
543 then compared  $-2*LL_{max}$  and BIC calculated from a 5-fold cross-validation with separate training and  
544 testing for the PT model and EV model in paired  $t$ -tests. We also generated model simulations for PT and  
545 EV model in **Figure S2** after optimizing model's parameters.

546 As in classical expected value theory in economics<sup>52</sup>, a convex utility function ( $\alpha > 1$ ) implies risk seeking,  
547 because in this scenario, the subject values large reward amounts disproportionately more than small  
548 reward amounts. Gain from winning the gamble thus has a stronger influence on choice than loss from  
549 losing the gamble. In the same way, a concave utility function ( $\alpha < 1$ ) implies risk seeking, because  
550 large reward amounts are valued disproportionately less than small ones.

551 The  $\lambda$  can further influence subject's risk-attitude in the context of gain or loss because it modulate the  
552 curvature of utility function in gain to that in the loss context. With a  $\lambda > 1$ , the utility function in the  
553 loss context will be sharper than that in the gain context, indicating the subject is more sensitive to the  
554 value change in the loss context. While with a  $\lambda < 1$ , the utility function in the loss context will be flatter  
555 than that in the gain context, indicating the subject is less sensitive to the value change in the loss  
556 context.

557 Independently, a non-linear weighting of probabilities can also influence risk attitude. For example, an S-  
558 shaped probability weighting function ( $\gamma < 1$ ) implies that the subject overweighs small probabilities  
559 and underweights the large probabilities. This would lead to higher willingness to accept a risky gamble,  
560 because small probabilities to win large amounts would be overweighed relative to high probabilities to  
561 win moderate amounts.

562 The bias term in the softmax function can also influence a subject's risky choices independent to the  
563 subjective value of options. A negative bias will result with risk-seeking behavior because the subject  
564 tends to choose gamble while the SVs of gamble and sure are identical. In the other hand, a positive bias  
565 will result with risk-averse behavior because the subject tends to choose sure while the SVs of gamble  
566 and sure are identical.

## 567 **Cortical localization and estimation of recording locations**

568 We used T1 and T2 magnetic resonance images (MRIs) obtained for the monkey (3.0 T) to determine the  
569 location of the anterior insula. In primates, the insular cortex constitutes a separate cortical lobe,  
570 located on the lateral aspect of the forebrain, in the depth of the Sylvian or lateral fissure (LF) (**Figure**  
571 **2g**). It is adjoined anteriorly by the orbital prefrontal cortex, and it is covered dorsally by the  
572 frontoparietal operculum and ventrally by the temporal operculum. The excision of the two opercula  
573 and part of the orbital prefrontal cortex reveals the insula proper, delimited by the anterior, superior,  
574 and inferior peri-insular (or limiting or circular) sulci. We used the known stereoscopic recording  
575 chamber location and recording depth of the electrode to estimate the location of each recorded  
576 neurons. The estimated recording locations were superimposed on the MRI scans of each monkey.  
577 Cortical areas were estimated using the second updated version of the macaque monkey brain atlas by  
578 Saleem and Logothetis<sup>54</sup> with a web-based brain atlases<sup>55</sup>.

## 579 **Surgical procedures**

580 Each animal was surgically implanted with a titanium head post and a hexagonal titanium recording  
581 chamber (29mm in diameter) 20.5 mm (Monkey G) and 16 mm (Monkey O) lateral to the midline, and  
582 30 mm (Monkey G) and 34.5 mm (Monkey O) anterior of the interaural line. A craniotomy was then  
583 performed in the chambers on each animal, allowing access to the AIC. The location of AIC was  
584 determined with T1 and T2 magnetic resonance images (MRIs, 3.0T) obtained for each monkey. All  
585 sterile surgeries were performed under anesthesia. Post-surgical pain was controlled with an opiate  
586 analgesic (buprenex; 0.01 mg/kg IM), administered twice daily for 5 days postoperatively.

### 587 **Neurophysiological recording procedures**

588 Single neuron activities were recorded extracellularly with single tungsten microelectrodes (impedance  
589 of 2-4 MΩs, Frederick Haer, Bowdoinham, ME). Electrodes were inserted through a guide tube  
590 positioned just above the surface of the dura mater and were lowered into the cortex under control of a  
591 self-built Microdrive system. The electrodes penetrated the cortex perpendicular to the surface of the  
592 cortex. The depths of the neurons were estimated by their recording locations relative to the surface of  
593 the cortex. Electrophysiological data were collected using the TDT system (Tucker & Davis). Action  
594 potentials were amplified, filtered, and discriminated conventionally with a time-amplitude window  
595 discriminator. Spikes were isolated online if the amplitude of the action potential was sufficiently above  
596 a background threshold to reliably trigger a time-amplitude window discriminator and the waveform of  
597 the action potential was invariant and sustained throughout the experimental recording. Spikes were  
598 then identified using principal component analysis (PCA) and the time stamps were collected at a  
599 sampling rate of 1,000 Hz.

### 600 **Spike density function**

601 To represent neural activity as a continuous function, we calculated spike density functions by  
602 convolving the peri-stimulus time histogram with a growth-decay exponential function that resembled  
603 a postsynaptic potential<sup>56</sup>. Each spike therefore exerts influence only forward in time. The equation  
604 describes rate (R) as a function of time (t):  $R(t) = (1 - \exp(-t/\tau_g)) * \exp(-t/\tau_d)$ , where  $\tau_g$  is the time constant  
605 for the growth phase of the potential and  $\tau_d$  is the time constant for the decay phase. Based on  
606 physiological data from excitatory synapses, we used 1 ms for the value of  $\tau_g$  and 20 ms for the value of  
607  $\tau_d$ <sup>57</sup>.

### 608 **Linear regression analysis of neuronal coding**

609 To find AIC neurons, whose neuronal activities reflect specific decision-related variable(s), we performed  
610 a linear regression with its mean Firing rate (FR) within the choice period for each trial as the dependent  
611 variable, and a predictor derived from the decision-related variables as the independent variable:

$$FR = constant + \beta * predictor$$

612 in which,  $\beta$  was the coefficient of the predictor. A constant term was added as a baseline model.

613 To tested four different classes of decision-related variables: (1) "Token-asset" variables, (2) "Gain/Loss-  
614 Value" variables, (3) "Risk" variables, and (4) a "Absolute value" variable. In total, we considered 16

615 different potential decision-related variables, as well as a baseline model that consisted only of a  
616 constant term.

617 Token-asset variables were variables that represented the start token number in one of three different  
618 types. The first type, the *linear token signal*, encoded the start token number in a linear, continuous  
619 manner (monotonically rising or falling from 0 to 5). The second type, the *binary token signal*, encoded  
620 the start token number in a binary, discontinuous manner (with a value of “1” for trials with start token  
621 number 0 to 3 and a value of “2” for trials with start token number 3-5). The third type, the *numerical*  
622 *token signal*, encoded the start token number in a Gaussian manner with the peak of the activity at one  
623 of the token numbers from 0 to 5, and the activity symmetrically falling for token numbers that were  
624 smaller or larger than the peak.

625 Gain/Loss-Value variables were variables that represented the gain/loss context, the expected value of  
626 options, or gain/loss context-dependent value signals. We tested five types of variables. The first type,  
627 the *gain/loss signal*, encoded the context of gain or loss in a binary manner. Trials in the gain context  
628 were indicated with a “1”, and trials in the loss context with a “-1”. The only exception were no-choice  
629 trials with a sure option with EV = 0, which were indicated with a “0”. The second type, the *linear value*  
630 *signal*, encoded the expected value of options in a linear, continuous manner across both the gain and  
631 loss context (with a range from -3 to 3). The remaining types also encoded the expected value of options,  
632 but contingent on the gain/loss context. The third type, the *gain value signal*, encoded the expected  
633 value of options in a linear manner, but only in the gain context (options with EV larger than 0 were  
634 encoded as the original number, otherwise were encoded as “0”), while the fourth type, the *loss value*  
635 *signal*, encoded the expected value of options in a linear manner only in the loss context (options with  
636 EV smaller than 0 were encoded as the original number, otherwise were encoded as “0”). The fifth type,  
637 the *behavioral salience signal*, encoded the expected value of options in a linear but asymmetric  
638 direction for the gain and loss context. Thus, this signal encoded the absolute distance of the value from  
639 zero, independent of whether it represented a gain or a loss (e.g. both an option with EV = 1.5 and an  
640 option with EV = -1.5 would be encoded as “1.5”).

641 Risk variables were variables that represented the variance of possible outcomes of an option  
642 (calculated by  $\sqrt{p(1-p)}$ , in which  $p$  was the winning probability of the option). We considered two  
643 different types. The first type, the *linear risk signal*, encoded the variance of outcome in a linear manner  
644 proportional to the variance. The second type, the *binary risk signal*, encoded whether the outcome of  
645 option was uncertain or not in a binary manner (with a value of “1” for all gamble options and a value of  
646 “0” for all sure options).

647 So far, value always was defined as a relative change of tokens, independent of the start token number.  
648 We also considered an *absolute value signal* (i.e., the sum of all possible end token numbers, weight by  
649 their probability). This signal took into account not only the possible change in token number, but also  
650 the start token number. Thus, it represented the outcome of a choice in absolute framework that  
651 reflected how close the monkey was to earning fluid reward.

652 **Mix-selective neuronal coding with regression analysis**

653 The regression analysis using the series of single variable models indicated that many neurons encoded  
654 multiple decision-related variables. We therefore further investigated the contribution of decision-  
655 related variables to neural activity, by using a multiple linear regression with the mean Firing rate (FR)  
656 within the choice period for each trial as the dependent variable, and predictors derived from the  
657 decision-related variables as the independent variables.

$$FR = constant + \alpha_1 * predictor_1 + \dots + \alpha_i * predictor_i$$

658 We fitted a family of regression models with all possible combination of the basic decision-related  
659 variables described in the last section. This resulted in a total of 163 tested models. For each neuron, we  
660 determined the best-fitting model using the Akaike information criterion and classified it as belonging to  
661 different functional categories according to the variables that were included in the best-fitting model.

### 662 **Sensitivity to value changes in gain and loss value cells**

663 We examined whether neurons carrying *Loss value signals* and *Gain Value signals* showed different  
664 sensitivity to changes in value. We estimated the absolute value of the standardized regression  
665 coefficients (|SRCs|) of firing rate of Loss-Value Neurons in the loss context and |SRCs| of firing rate of  
666 Gain-Value Neuron in the gain context, respectively. We included all neurons for statistical test, whose  
667 best-fitting model included a Loss or Gain Value Signal. We performed a permutation test with 10,000  
668 iterations to test if the normalized |SRCs| of Loss Value (n = 39) and Gain Value neurons (n = 12) showed  
669 a significant difference (**Figure 3a**).

670 We also examined whether the sensitivity to value change in neurons carrying *Loss value signals* and  
671 *Gain Value signals* was influenced by the wealth level (i.e., the number of tokens owned at the  
672 beginning of the trial). We compared |SRCs| of Loss and Gain Value neurons in trials with low [0,1,2] or  
673 high [3,4,5] token level. We performed a permutation test with 10,000 iterations to test if the  
674 normalized |SRCs| of Loss Value (n = 39) and Gain Value neurons (n = 12) showed a significant  
675 difference for low and high token levels (**Figure 3c**).

### 676 **Receiver operating criterion (ROC) analysis**

677 To determine whether neural activity of the AIC neurons was correlated with the monkey's choice  
678 behavior or risk-attitude, we computed a receiver operation characteristic (ROC) for each cell and  
679 computed the area under the curve (AUC) as a measure of the cell's discrimination ability. We computed  
680 the AUC value of *choice probability* by comparing the distributions of firing rates associated with each of  
681 the two choices (i.e. choice of "gamble" or choice of "sure"). We computed the AUC value of *risk-*  
682 *seeking probability* by comparing the two distributions of firing rates associated with risk-seeking and  
683 risk-avoidance behavior. Risk-seeking trials were defined as trials where the monkey chose the gamble,  
684 even so the expected value of the gamble option was smaller than the expected value of the sure option.  
685 We did not include trials, in which the monkey chose the gamble option and it had a higher expected  
686 value, because in that case the monkey's choice did not give any indication about his risk-attitude at that  
687 moment. Conversely, risk-avoiding trials were defined as trials where the monkey chose the sure option,  
688 even so the expected value of the sure option was smaller than the expected value of the gamble option.

689 Thus, trials used to compute the risk-seeking probability were a subset of the trials used to compute  
690 choice probability, in which the monkeys did not make choices that maximized the expected value of the  
691 chosen option.

692 **Chi-square test**

693 To test whether neurons encoding specific behaviorally relevant variables were more likely to carry  
694 significant choice or risk-attitude probability signals, we used a chi-square test, which is used to  
695 determine whether there is a statistically significant difference between the expected frequencies and  
696 the observed frequencies in one or more categories.

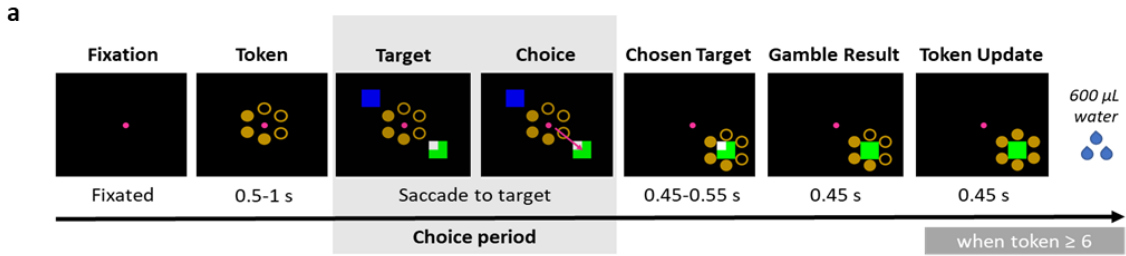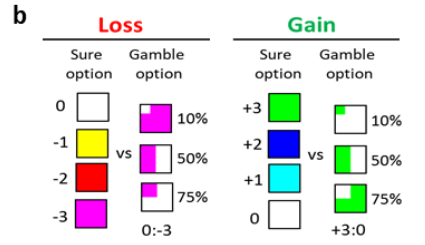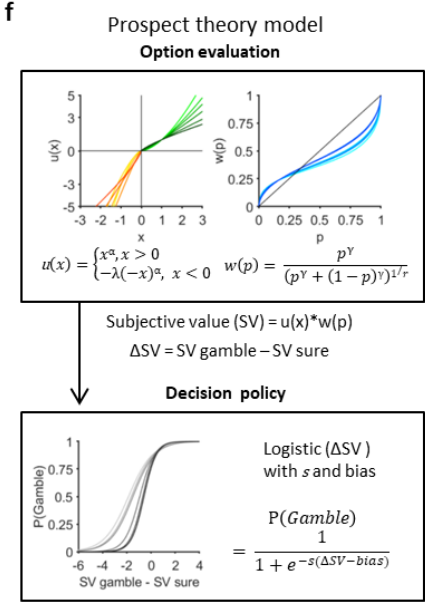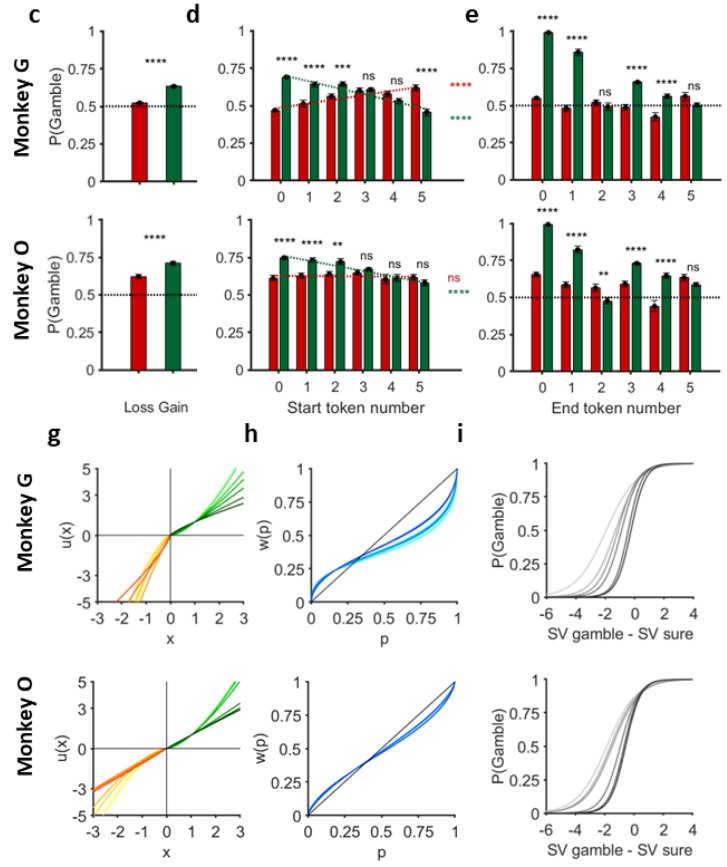

698 **Figure 1. Behavior performance of monkeys in the token-based gambling task.**

699 (a) Schematic of the task. Each trial starts with a fixation dot at the center of the screen. Upon the  
700 monkey fixated to the central dot, the current number of tokens it has was presented (filled circles of  
701 the hexagonal placeholder). Following 0.5-1s delay, one ('forced-choice' trial) or two ('choice' trial)  
702 options were presented (detailed in (b)), and the monkey indicated its choice by making a saccade to the  
703 target. The unchosen option then disappeared, and the current number of tokens was presented again  
704 in the surround of the chosen target. The outcome of the chosen target revealed after a delay (0.45-0.55  
705 s), indicated by the color change of the square, and the number of tokens that the monkey possessed  
706 was updated accordingly. The monkey was rewarded (600uL of water) whenever it collected six tokens  
707 or more at the end of the trial. Shadowed area indicated the choice period of which the neuronal data  
708 was analyzed.

709 (b) Set of options. Each option is a square (x degree), of which the color(s) indicated the possible  
710 outcome(s) (-3 to +3, in units of token change), and the portion of colored area indicated the probability  
711 (10%, 50%, 75%, 100%) of the corresponding outcome to be realized. The choice trials consisted of two  
712 types (gain vs. loss context), and there was always a sure option paired with a gamble option – i.e., only  
713 the combination of [sure gain vs. gamble gain] and [sure loss vs. gamble loss] were available. In forced-  
714 choice trials, only one option was presented, which could be either a sure option or gamble option (gain  
715 or loss). See Methods for details.

716 (c) The probability of monkey choosing gamble option in gain/loss contexts. Upper and lower panels  
717 represent data from two different monkeys, respectively. Green: gain context; Red: loss context. Error  
718 bars: S.E.M; \*\*\*\*  $p < 10^{-4}$ , paired t-test.

719 (d) The probability of monkey choosing gamble option, plotted by context and the start token number.  
720 Green: gain context; Red: loss context. Error bars: S.E.M; n.s.: not statistically significant ( $p > 0.05$ ), \*\*  
721  $p < 10^{-2}$ , \*\*\*  $p < 10^{-3}$ , \*\*\*\*  $p < 10^{-4}$  in paired t-test (black), \*\*\*\*  $p < 10^{-4}$  in regression analyses (green or red).

722 (e) The probability of monkey choosing gamble option, plotted by context and the end token number.  
723 Conventions as in (d).

724 (f) Behavior modeling. The model consists of two parts: first in the process of option evaluation (upper  
725 panel), the subjective value (SV) of each option was calculated as the product of a utility function and a  
726 probability weighting function. Both functions are nonlinear as per the Prospect theory (PT)  
727 hypothesized. The subjective value difference between the two options ( $\Delta SV$ ) was then used to  
728 determine the probability of choosing the gamble option via a logistic function –i.e., decision policy  
729 (lower panel).

730 (g-i) The best fit utility functions (g), probability weighting functions (h), and the decision policies (i)  
731 based on the observed performance. Upper and lower panels represent data from two different  
732 monkeys, respectively. Color gradients represent different start token numbers (light to dark: 0 to 5).



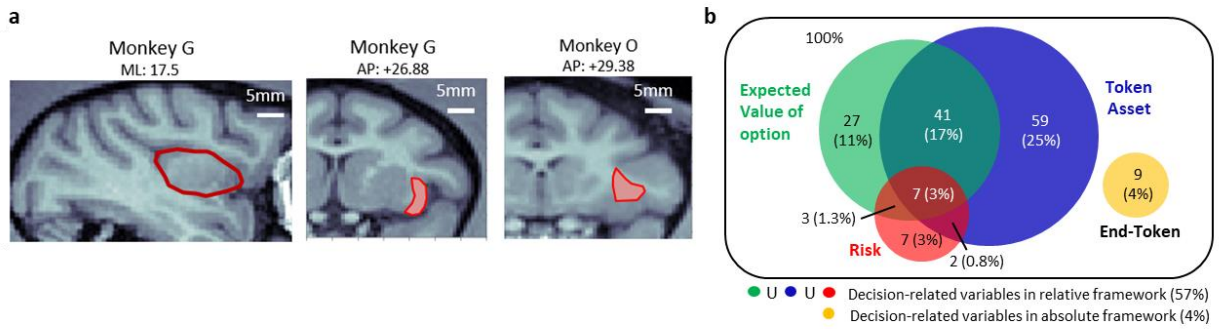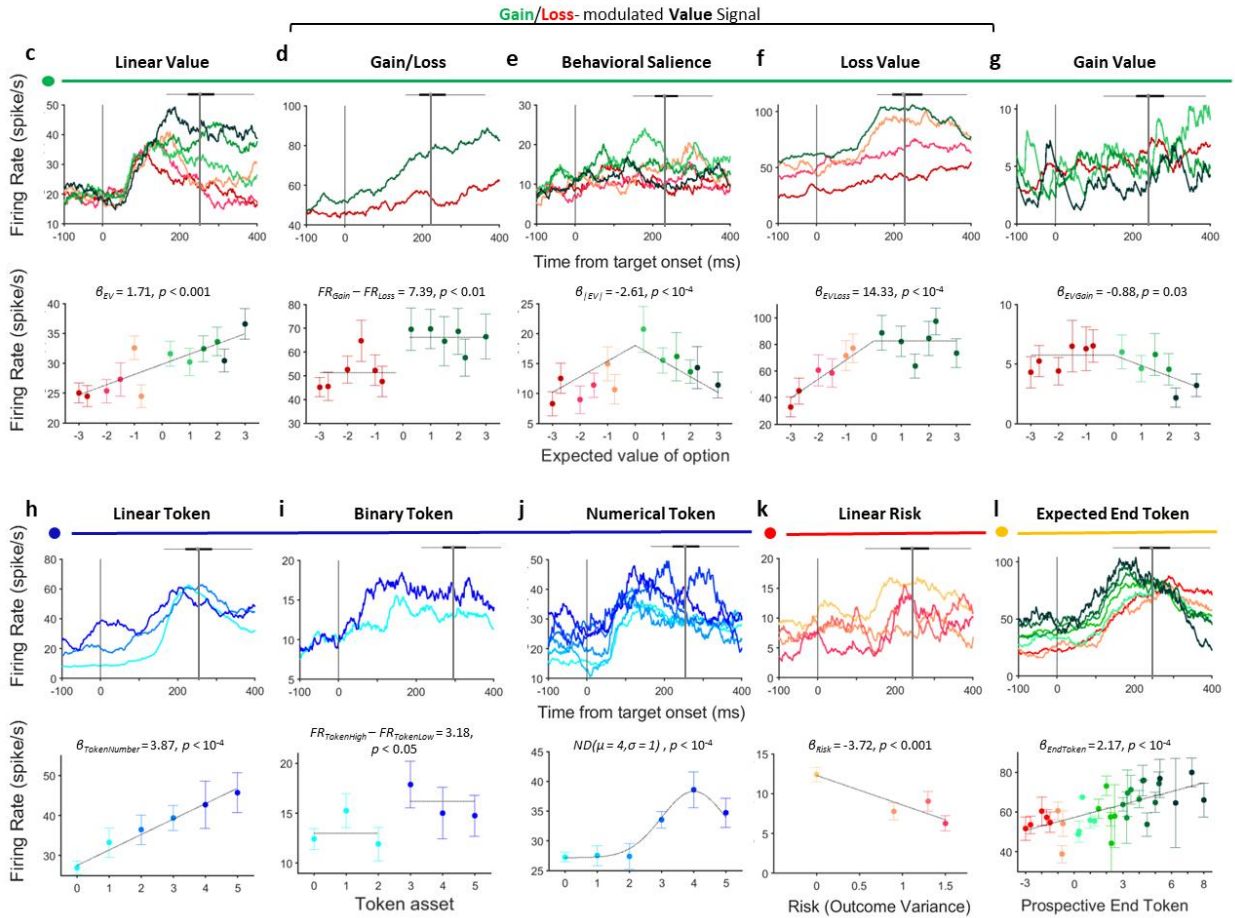

734 **Figure 2. AIC Neurons encode diverse task-related variables in forced-choice trials.**

735 (a) MRI images showing the area of recording of each monkey. Left and middle: sagittal (left) and  
736 coronal (middle) view of the insular cortex of monkey G. Right: coronal view of the insular cortex of  
737 monkey O.

738 (b) Venn diagram of the neurons encoding four task-related variables in the forced-choice trials. Green:  
739 expected value of option (EV); Blue: start token number; Red: risk (variability of potential outcomes);  
740 Yellow: end token number.

741 (c-g) Example neurons showing a variety of patterns by which the contextual information (gain vs. loss)  
742 and/or the EV were encoded. Upper panels: spike density function (SDF), aligned by the target onset  
743 ( $t=0$ ). Lower panels: mean firing rate of each example neuron at different EV levels. Mean firing rate  
744 was calculated using the window from target onset to saccade initiation (varied across trials). The  
745 distribution of saccade timing was presented as a boxplot on top of each SDF. For clarity, when plotting  
746 the SDF, data of some EV levels were grouped together, as indicated by the color codes. (c) linear  
747 encoding of the EV across contexts; (d) binary encoding of gain/loss context; (e) linear encoding of the  
748 absolute value of the EV in both contexts; (f) linear encoding of the EV in the loss context; (g) linear  
749 encoding of the EV in the gain context.

750 (h-j) Example neurons showing a variety of patterns by which the token information was encoded. (h)  
751 linear; (i) binary encoding of the start token number; (j) encoding of a specific number of start token (=4).  
752 Conventions are as in (c-g).

753 (k) Example neuron showing linear encoding of the risk. Conventions are as in (c-g).

754 (l) Example neuron showing linear encoding of the end token number. Conventions are as in (c-g).

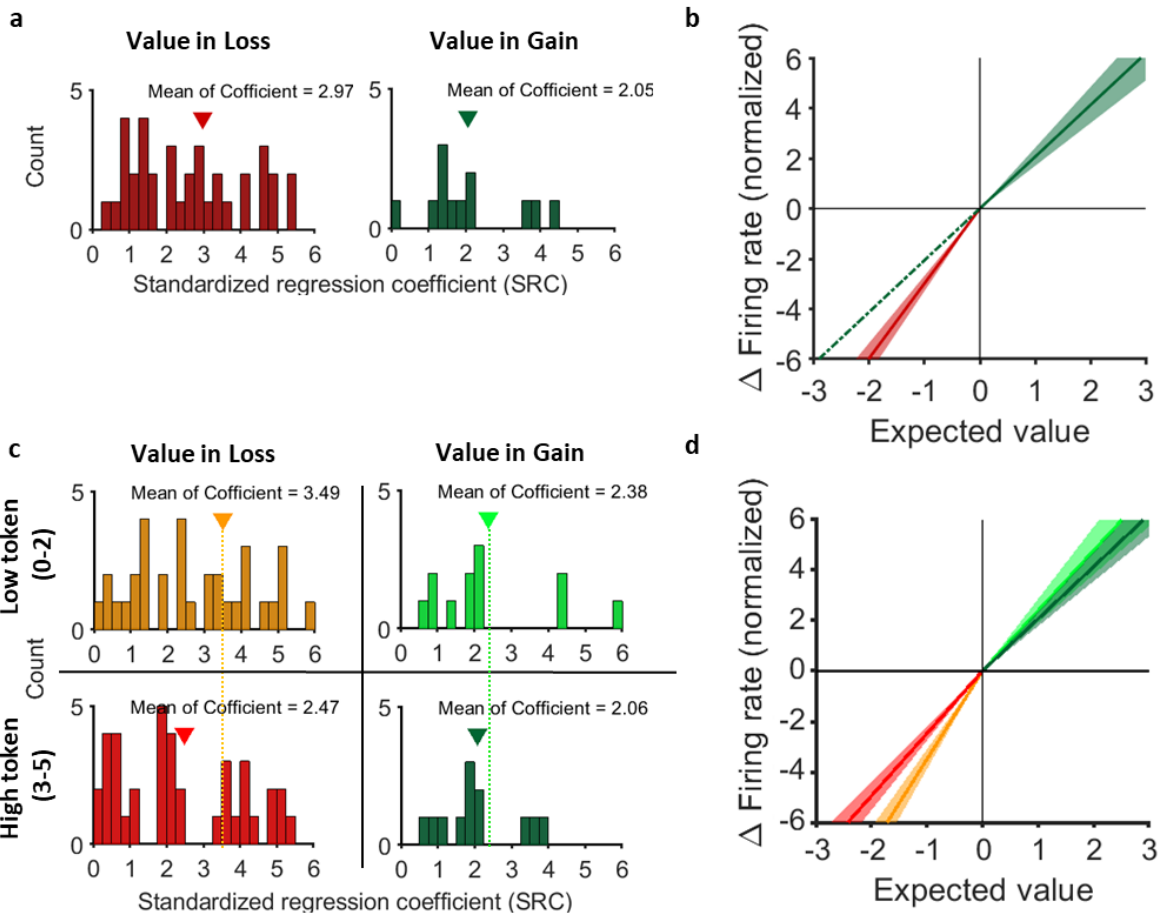

756 **Figure 3. Gain-Value and loss-Value neurons exhibit differential sensitivity to EV change in the gain**  
757 **and loss context.**

758 (a-b) Linear regression was performed using the expected value of option (EV) as the regressor, to  
759 account for the variability of firing rates for Loss-Value neurons (39 neurons) in loss-context trials; and  
760 for Gain-Value neurons (12 neurons) in gain-context trials. See Methods for details of the neuron  
761 selection.

762 (a) Distribution of the standardized regression coefficients (SRC). For cross-context comparison, the  
763 absolute value of SRCs ( $|SRCs|$ ) were plotted. Left panel: data of those Loss-Value neurons in loss-  
764 context trials. Right panel: data of those Gain-Value neurons in gain-context trials. Each count  
765 represents one neuron. Inverted triangle: mean of the distribution.

766 (b) Replot the SRCs (as the slope of  $\Delta FR$  to  $\Delta EV$ ) of Loss Value neurons (red) and those of Gain Value  
767 neurons (green) in loss- and gain-context, respectively. Note that the slope of red line is steeper than  
768 the slope of green line ( $p=0.053$ , permutation test), indicating that as compared to the Gain Value  
769 neurons, the Loss Value neurons are more sensitive to EV change (in the loss context), mirroring the  
770 pattern observed from behavior (Fig.1g). Solid line and shadow area: mean  $\pm$  S.E.M.

771 (c-d) Linear regression was performed using the expected value of option (EV) as the regressor, to  
772 account for the variability of firing rates for Loss-Value neurons in loss-context trials in low or high  
773 token level; and for Gain-Value neurons in gain-context trials in low or high token level.

774 (c) Distribution of the  $|SRCs|$  of Loss Value neurons in loss-context (left column) and  $|SRCs|$  of Gain  
775 Value neurons in gain-context (right column), split by start token levels. Upper row: low token level  
776 (start token number = 0-2; Bottom row: high token level (start token number = 3-5). Conventions as in  
777 (a).

778 (d) Replot the SRCs from (c). Note that for both gain- and loss- contexts, the slope becomes shallower as  
779 the token level increases, consistent to the pattern observed from behavior (Fig.1g).

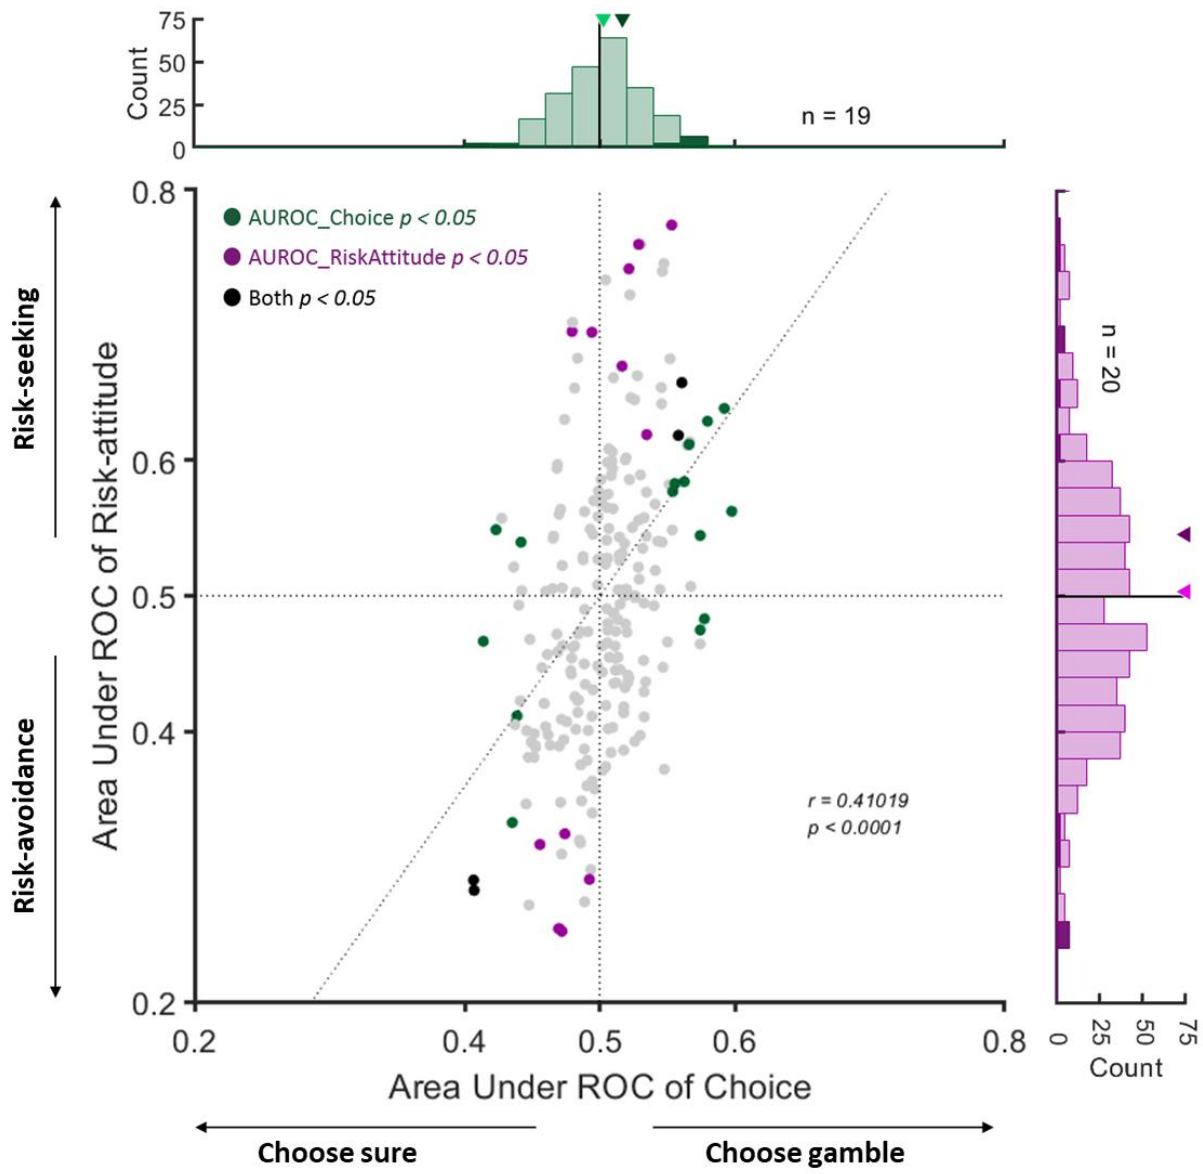

781 **Figure 4. Distribution of area under the curve (AUC) of receiver operating characteristic (ROC) for**  
782 **choice and risk-attitude in individual neurons.**

783 AUC values capturing the covariation of each neuron with differences in choice (choosing gamble or sure)  
784 and risk-attitude (risk-seeking or risk-avoidance). Each point represents one neuron ( $n = 240$ ), and colors  
785 indicate the significance of the two AUC values. In the marginal distributions, significant neurons are  
786 indicated in darker shades and the arrowheads indicate the average values across the entire distribution  
787 (light green or light purple) and the subset of neurons with significant AUC (dark green or dark purple),  
788 respectively. The gray vertical and horizontal dashed lines show the area of no significant discrimination  
789 ability (AUC of choice = 0.5 and AUC of risk-attitude = 0.5). The broken line represents the linear  
790 regression relating the AUC of choice and AUC of risk-attitude ( $r$  and  $p$  values refer to the regression  
791 slope).

| Model                      | Start token # | DF | $\alpha$   | $\lambda$  | $\gamma$   | Inverse temperature (s) | Directional bias to gamble (bias) | -2*LLmax   | BIC        |
|----------------------------|---------------|----|------------|------------|------------|-------------------------|-----------------------------------|------------|------------|
| Prospect theory (PT) model | 0             | 5  | 1.63, 1.58 | 3.04, 1.12 | 0.52, 0.73 | 0.96, 1.01              | -1.93, -1.86                      | 5100, 6494 | 5146, 6540 |
|                            | 1             | 5  | 1.43, 1.55 | 2.40, 0.93 | 0.56, 0.79 | 1.26, 1.09              | -1.30, -1.62                      | 1522, 1481 | 1561, 1516 |
|                            | 2             | 5  | 1.30, 1.48 | 3.07, 0.87 | 0.55, 0.77 | 1.52, 1.09              | -1.13, -1.49                      | 1418, 1379 | 1458, 1416 |
|                            | 3             | 5  | 1.15, 1.11 | 3.86, 0.91 | 0.55, 0.78 | 1.69, 1.63              | -0.89, -0.93                      | 2403, 2427 | 2445, 2468 |
|                            | 4             | 5  | 0.95, 1.01 | 2.96, 1.03 | 0.63, 0.78 | 2.11, 1.93              | -0.44, -0.68                      | 1072, 894  | 1110, 929  |
|                            | 5             | 5  | 0.79, 0.97 | 2.65, 1.12 | 0.62, 0.73 | 2.05, 1.96              | -0.25, -0.58                      | 1347, 1178 | 1385, 1215 |
| Expected value (EV) model  | 0             | 2  | -          | -          | -          | 1.89, 1.70              | -0.67, -1.00                      | 7204, 7121 | 7231, 7149 |
|                            | 1             | 2  | -          | -          | -          | 2.01, 1.72              | -0.64, -0.98                      | 1856, 1600 | 1879, 1623 |
|                            | 2             | 2  | -          | -          | -          | 2.19, 1.58              | -0.61, -0.99                      | 1746, 1455 | 1770, 1478 |
|                            | 3             | 2  | -          | -          | -          | 2.12, 1.65              | -0.57, -0.90                      | 2813, 2427 | 2838, 2499 |
|                            | 4             | 2  | -          | -          | -          | 2.18, 1.86              | -0.31, -0.67                      | 1219, 908  | 1242, 930  |
|                            | 5             | 2  | -          | -          | -          | 1.63, 1.83              | -0.19, -0.57                      | 1587, 1178 | 1609, 1232 |

792

793 **Table 1. Model comparison.**

794 DF, degrees of freedom; LLmax, maximal log likelihood; BIC, Bayesian Information Criterion (computed  
795 with LLmax). The table summarizes for each model the likelihood maximizing ('best') parameters  
796 average across sessions and its fitting performances for each monkey.

797 Comparing the model fit of PT model and EV model: t-test; Monkey G,  $p < 10^{-4}$ ,  $p < 10^{-4}$ ,  $p < 0.05$ ,  $p < 0.05$ ,  
798  $p = 0.09$ , and  $p < 0.05$  for start token number 0-5, respectively; Monkey O,  $p < 10^{-2}$ ,  $p < 10^{-3}$ ,  $p = 0.55$ ,  $p = 0.62$ ,  
799  $p = 0.95$ , and  $p = 0.80$  for start token number 0-5, respectively.

800 Comparing the BIC of PT model and EV model: t-test; Monkey G,  $p < 10^{-4}$ ,  $p < 10^{-4}$ ,  $p < 10^{-2}$ ,  $p < 0.05$ ,  $p < 0.05$ ,  
801 and  $p < 0.01$ ; Monkey O,  $p < 10^{-2}$ ,  $p < 10^{-4}$ ,  $p = 0.22$ ,  $p = 0.17$ ,  $p = 0.20$ , and  $p = 0.34$  for start token number 0-5,  
802 respectively.

|                    |                         |                         |                      |                                |                         |                    |                    |                   |                     |
|--------------------|-------------------------|-------------------------|----------------------|--------------------------------|-------------------------|--------------------|--------------------|-------------------|---------------------|
| Gain/Loss-Value    | Gain/Loss<br>13 (5%)    | Loss Value<br>29 (12%)  | Gain Value<br>4 (2%) | Behavioral Salience<br>13 (5%) | Linear Value<br>14 (6%) |                    |                    |                   | All<br>73 (30%)     |
| Token              | Linear Token<br>13 (5%) | Binary Token<br>11 (5%) | Token 0<br>11 (5%)   | Token 1<br>16 (7%)             | Token 2<br>24 (10%)     | Token 3<br>12 (5%) | Token 4<br>10 (4%) | Token 5<br>8 (3%) | All<br>105 (44%)    |
| Risk               | Linear Risk<br>9 (4%)   | Binary Risk<br>10 (4%)  |                      |                                |                         |                    |                    |                   | All<br>19 (8%)      |
| Expected End Token | End Token<br>9 (4%)     |                         |                      |                                |                         |                    |                    |                   | End Token<br>9 (4%) |

803

804 **Table 2.** Summary of the number and percentage of significant responding neurons in different subsets  
805 of neuron types for all recorded AIC neurons.

806

|               | Token + Value + Risk | Token + Value | Token + Risk | Value + Risk | Token | Value | Risk | End Token | None |
|---------------|----------------------|---------------|--------------|--------------|-------|-------|------|-----------|------|
| Both          | 0                    | 0             | 1            | 0            | 3     | 0     | 0    | 0         | 0    |
| Choice        | 0                    | 0             | 3            | 0            | 5     | 0     | 2    | 1         | 4    |
| Risk-attitude | 0                    | 1             | 3            | 0            | 8     | 0     | 3    | 0         | 1    |
| Neither       | 3                    | 12            | 23           | 1            | 104   | 5     | 16   | 9         | 32   |

807

808 **Table 3.** The number of each signal during the choice period in the force choice trial, recounted based  
809 upon the AUC for choice or risk-attitude.



810 **Reference**

- 811 1. Canessa, N. *et al.* The functional and structural neural basis of individual differences in loss aversion. *J.*  
812 *Neurosci.* **33**, 14307–14317 (2013).
- 813 2. Juechems, K., Balaguer, J., Ruz, M. & Summerfield, C. Ventromedial prefrontal cortex encodes a latent  
814 estimate of cumulative reward. *Neuron* **93**, 705-714. e4 (2017).
- 815 3. Yamada, H., Tymula, A., Louie, K. & Glimcher, P. W. Thirst-dependent risk preferences in monkeys  
816 identify a primitive form of wealth. *Proc. Natl. Acad. Sci.* **110**, 15788–15793 (2013).
- 817 4. Vermeer, A. B. L., Boksem, M. A. & Sanfey, A. G. Neural mechanisms underlying context-dependent  
818 shifts in risk preferences. *NeuroImage* **103**, 355–363 (2014).
- 819 5. Stephens, D. W. Decision ecology: foraging and the ecology of animal decision making. *Cogn. Affect.*  
820 *Behav. Neurosci.* **8**, 475–484 (2008).
- 821 6. Tversky, A. & Kahneman, D. Prospect theory: An analysis of decision under risk. *Econometrica* **47**,  
822 263–291 (1979).
- 823 7. Ruggeri, K. *et al.* Replicating patterns of prospect theory for decision under risk. *Nat. Hum. Behav.* 1–  
824 12 (2020).
- 825 8. Wakker, P. P. *Prospect theory: For risk and ambiguity.* (Cambridge university press, 2010).
- 826 9. Breiter, H. C., Aharon, I., Kahneman, D., Dale, A. & Shizgal, P. Functional imaging of neural responses  
827 to expectancy and experience of monetary gains and losses. *Neuron* **30**, 619–639 (2001).
- 828 10. Hsu, M., Bhatt, M., Adolphs, R., Tranel, D. & Camerer, C. F. Neural systems responding to  
829 degrees of uncertainty in human decision-making. *Science* **310**, 1680–1683 (2005).
- 830 11. Hsu, M., Krajbich, I., Zhao, C. & Camerer, C. F. Neural response to reward anticipation under risk  
831 is nonlinear in probabilities. *J. Neurosci.* **29**, 2231–2237 (2009).
- 832 12. Jung, W. H., Lee, S., Lerman, C. & Kable, J. W. Amygdala functional and structural connectivity  
833 predicts individual risk tolerance. *Neuron* **98**, 394-404. e4 (2018).

- 834 13. Kuhnen, C. M. & Knutson, B. The neural basis of financial risk taking. *Neuron* **47**, 763–770 (2005).
- 835 14. Huettel, S. A., Stowe, C. J., Gordon, E. M., Warner, B. T. & Platt, M. L. Neural signatures of  
836 economic preferences for risk and ambiguity. *Neuron* **49**, 765–775 (2006).
- 837 15. Craig, A. D. How do you feel? Interoception: the sense of the physiological condition of the body.  
838 *Nat. Rev. Neurosci.* **3**, 655–666 (2002).
- 839 16. Craig, A. D. & Craig, A. D. How do you feel--now? The anterior insula and human awareness. *Nat.*  
840 *Rev. Neurosci.* **10**, (2009).
- 841 17. Shiv, B., Loewenstein, G. & Bechara, A. The dark side of emotion in decision-making: When  
842 individuals with decreased emotional reactions make more advantageous decisions. *Cogn. Brain Res.*  
843 **23**, 85–92 (2005).
- 844 18. Clark, L. *et al.* Differential effects of insular and ventromedial prefrontal cortex lesions on risky  
845 decision-making. *Brain* **131**, 1311–1322 (2008).
- 846 19. Mizuhiki, T., Richmond, B. J. & Shidara, M. Encoding of reward expectation by monkey anterior  
847 insular neurons. *J. Neurophysiol.* **107**, 2996–3007 (2012).
- 848 20. Kaskan, P. M. *et al.* Learned value shapes responses to objects in frontal and ventral stream  
849 networks in macaque monkeys. *Cereb. Cortex* **27**, 2739–2757 (2017).
- 850 21. Tversky, A. & Kahneman, D. The framing of decisions and the psychology of choice. *science* **211**,  
851 453–458 (1981).
- 852 22. Bossaerts, P. Risk and risk prediction error signals in anterior insula. *Brain Struct. Funct.* **214**,  
853 645–653 (2010).
- 854 23. Preuschoff, K., Quartz, S. R. & Bossaerts, P. Human insula activation reflects risk prediction  
855 errors as well as risk. *J. Neurosci.* **28**, 2745–2752 (2008).
- 856 24. Tversky, A. & Kahneman, D. Advances in prospect theory: Cumulative representation of  
857 uncertainty. *J. Risk Uncertain.* **5**, 297–323 (1992).

- 858 25. Farashahi, S., Azab, H., Hayden, B. & Soltani, A. On the flexibility of basic risk attitudes in  
859 monkeys. *J. Neurosci.* **38**, 4383–4398 (2018).
- 860 26. Stauffer, W. R., Lak, A., Bossaerts, P. & Schultz, W. Economic choices reveal probability  
861 distortion in macaque monkeys. *J. Neurosci.* **35**, 3146–3154 (2015).
- 862 27. Chen, M. K., Lakshminarayanan, V. & Santos, L. R. How basic are behavioral biases? Evidence  
863 from capuchin monkey trading behavior. *J. Polit. Econ.* **114**, 517–537 (2006).
- 864 28. Constantinople, C. M., Piet, A. T. & Brody, C. D. An analysis of decision under risk in rats. *Curr.*  
865 *Biol.* **29**, 2066-2074. e5 (2019).
- 866 29. So, N.-Y. & Stuphorn, V. Supplementary eye field encodes option and action value for saccades  
867 with variable reward. *J. Neurophysiol.* **104**, 2634–2653 (2010).
- 868 30. McCoy, A. N. & Platt, M. L. Risk-sensitive neurons in macaque posterior cingulate cortex. *Nat.*  
869 *Neurosci.* **8**, 1220–1227 (2005).
- 870 31. Hershey, J. C. & Schoemaker, P. J. Prospect theory's reflection hypothesis: A critical examination.  
871 *Organ. Behav. Hum. Perform.* **25**, 395–418 (1980).
- 872 32. Fishburn, P. C. & Kochenberger, G. A. Two-piece von Neumann-Morgenstern utility functions.  
873 *Decis. Sci.* **10**, 503–518 (1979).
- 874 33. Eisenreich, B. R., Hayden, B. Y. & Zimmermann, J. Macaques are risk-averse in a freely moving  
875 foraging task. *Sci. Rep.* **9**, 1–12 (2019).
- 876 34. Ogawa, H. Gustatory cortex of primates: anatomy and physiology. *Neurosci. Res.* **20**, 1–13 (1994).
- 877 35. Vincis, R., Chen, K., Czarnecki, L., Chen, J. & Fontanini, A. Dynamic representation of taste-  
878 related decisions in the gustatory insular cortex of mice. *Curr. Biol.* (2020).
- 879 36. Critchley, H. D. & Garfinkel, S. N. The influence of physiological signals on cognition. *Curr. Opin.*  
880 *Behav. Sci.* **19**, 13–18 (2018).

- 881 37. Livneh, Y. *et al.* Estimation of Current and Future Physiological States in Insular Cortex. *Neuron*  
882 (2020).
- 883 38. Nieder, A. & Dehaene, S. Representation of number in the brain. *Annu. Rev. Neurosci.* **32**, 185–  
884 208 (2009).
- 885 39. Nieder, A. The neuronal code for number. *Nat. Rev. Neurosci.* **17**, 366 (2016).
- 886 40. Kutter, E. F., Bostroem, J., Elger, C. E., Mormann, F. & Nieder, A. Single neurons in the human  
887 brain encode numbers. *Neuron* **100**, 753-761. e4 (2018).
- 888 41. Wang, L., Uhrig, L., Jarraya, B. & Dehaene, S. Representation of numerical and sequential  
889 patterns in macaque and human brains. *Curr. Biol.* **25**, 1966–1974 (2015).
- 890 42. Tom, S. M., Fox, C. R., Trepel, C. & Poldrack, R. A. The neural basis of loss aversion in decision-  
891 making under risk. *Science* **315**, 515–518 (2007).
- 892 43. Kahn, I. *et al.* The role of the amygdala in signaling prospective outcome of choice. *Neuron* **33**,  
893 983–994 (2002).
- 894 44. Knutson, B., Fong, G. W., Adams, C. M., Varner, J. L. & Hommer, D. Dissociation of reward  
895 anticipation and outcome with event-related fMRI. *Neuroreport* **12**, 3683–3687 (2001).
- 896 45. Yacubian, J. *et al.* Dissociable systems for gain-and loss-related value predictions and errors of  
897 prediction in the human brain. *J. Neurosci.* **26**, 9530–9537 (2006).
- 898 46. Loewenstein, G. F., Weber, E. U., Hsee, C. K. & Welch, N. Risk as feelings. *Psychol. Bull.* **127**, 267  
899 (2001).
- 900 47. Evrard, H. C. The organization of the primate insular cortex. *Front. Neuroanat.* **13**, 43 (2019).
- 901 48. Asaad, W. F. & Eskandar, E. N. A flexible software tool for temporally-precise behavioral control  
902 in Matlab. *J. Neurosci. Methods* **174**, 245–258 (2008).
- 903 49. Seo, H. & Lee, D. Behavioral and neural changes after gains and losses of conditioned reinforcers.  
904 *J. Neurosci.* **29**, 3627–3641 (2009).

- 905 50. Zandbelt, B. *Exgauss: a MATLAB toolbox for fitting the ex-Gaussian distribution to response time*  
906 *data. figshare.* (2014).
- 907 51. Kahneman, D. & Tversky, A. Prospect theory: An analysis of decision under risk. in *HANDBOOK*  
908 *OF THE FUNDAMENTALS OF FINANCIAL DECISION MAKING: Part I* 99–127 (World Scientific, 2013).
- 909 52. Lattimore, P. K., Baker, J. R. & Witte, A. D. *The influence of probability on risky choice: A*  
910 *parametric examination.* (1992).
- 911 53. Reil, J. C. Die sylvische Grube. *Arch Physiol* **9**, 195–208 (1809).
- 912 54. Reveley, C. *et al.* Three-dimensional digital template atlas of the macaque brain. *Cereb. Cortex*  
913 **27**, 4463–4477 (2017).
- 914 55. Bakker, R., Tiesinga, P. & Kötter, R. The scalable brain atlas: instant web-based access to public  
915 brain atlases and related content. *Neuroinformatics* **13**, 353–366 (2015).
- 916 56. Hanes, D. P., Patterson, W. F. & Schall, J. D. Role of frontal eye fields in countermanding  
917 saccades: visual, movement, and fixation activity. *J. Neurophysiol.* **79**, 817–834 (1998).
- 918 57. Sayer, R. J., Friedlander, M. J. & Redman, S. J. The time course and amplitude of EPSPs evoked at  
919 synapses between pairs of CA3/CA1 neurons in the hippocampal slice. *J. Neurosci.* **10**, 826–836  
920 (1990).

921

922 **Supplementary materials**

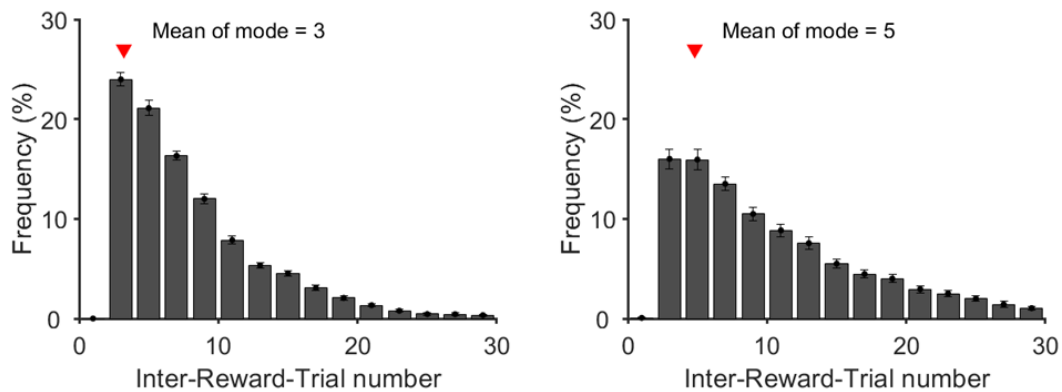

923 **Figure S1. Inter-Reward-Trial number for each monkey.**  
924

925 Monkeys used to accumulate the necessary 6 tokens for a standard fluid reward in 3-5 successive  
926 trials. Red triangle indicates the average trials to get the reward (I think it is better to use a vertical line  
927 to indicate average trials).

928 Error bars indicate SEM or estimates across sessions (session number = 37 for each monkey).

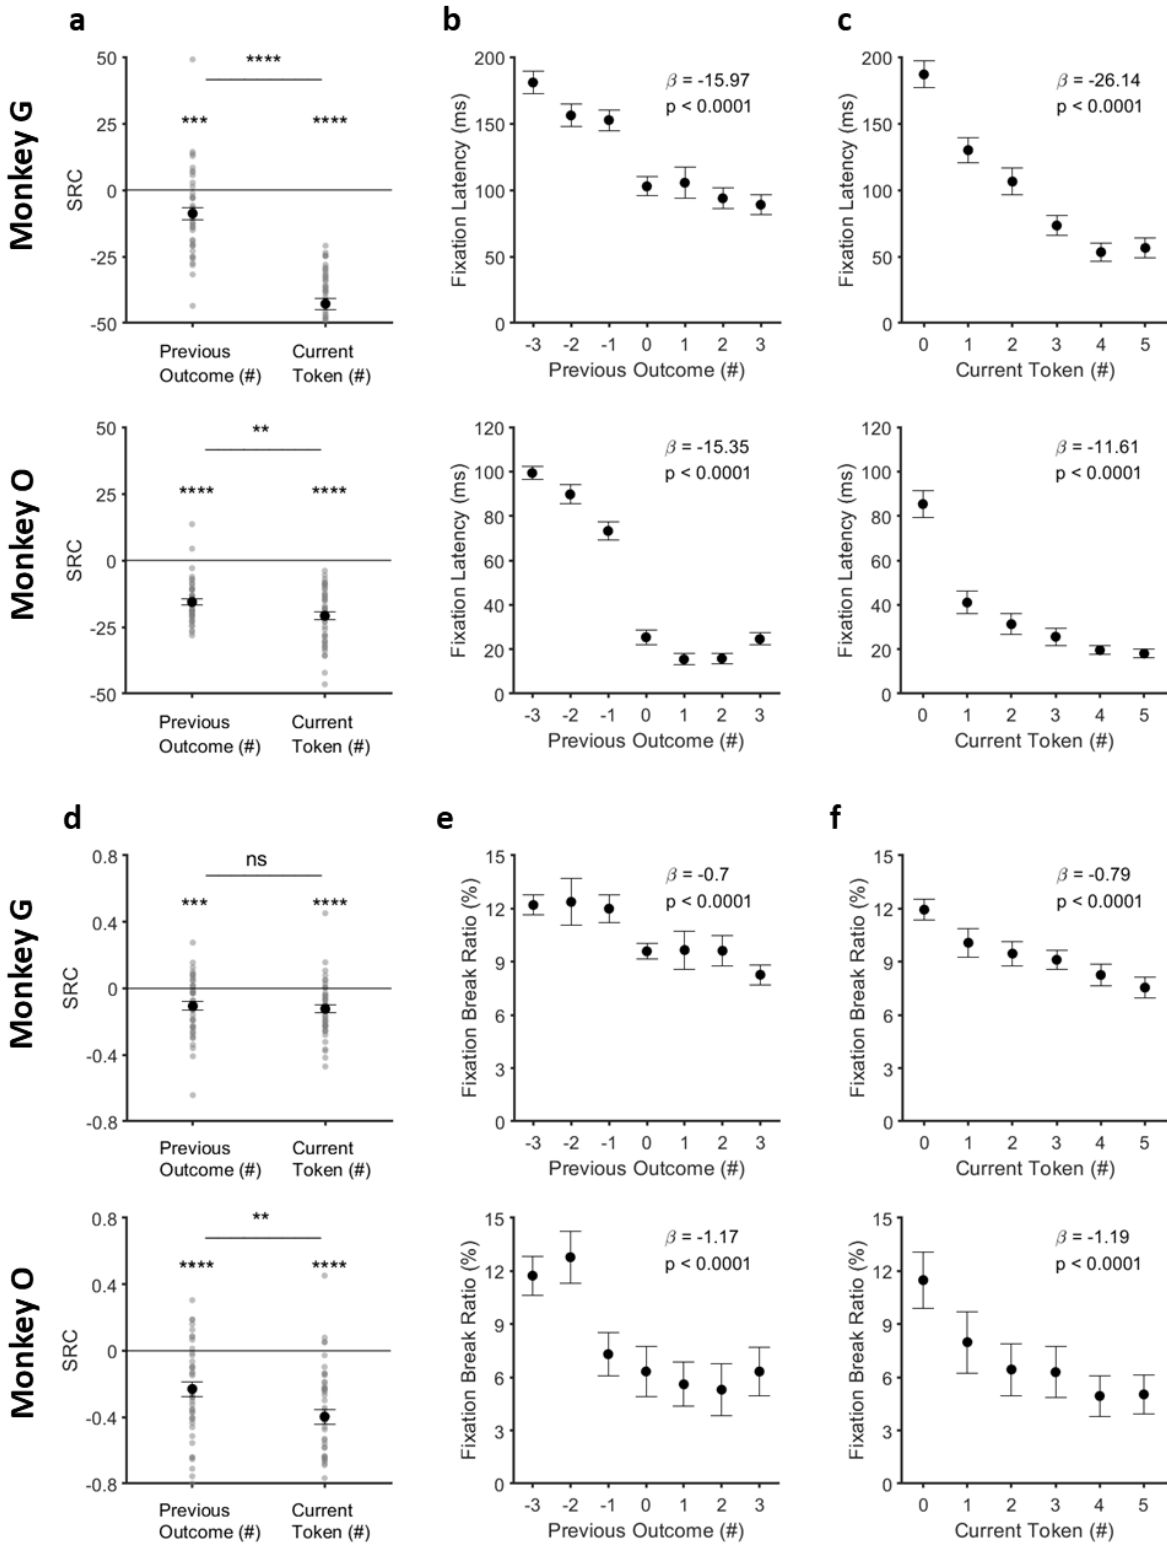

930 **Figure S2. Effect of current token asset and token outcome history on fixation latency and fixation**  
931 **break ratio.**

932 (a) Standardized regression coefficients (SRCs) for fixation latency (latency to fixate on the center point  
933 at the beginning of the trial before the token cue appears) as a function of previous outcome (token  
934 change in last trial) and current token number. Error bars indicate SEM of SRCs across sessions.

935 (b) Fixation latency as a function of previous outcome. Regression coefficient ( $\beta$ ) between fixation  
936 latency and the token number won or losses of the previous trial.

937 (c) Fixation latency as a function of current token asset. Regression coefficient ( $\beta$ ) between fixation  
938 latency and the start token number of the current trial.

939 (d) Standardized regression coefficients (SRCs) for fixation break ratio (failure to hold fixation on the  
940 center point long enough for token cues to appear) as a function of previous outcome (token change in  
941 last trial) and current token number. Error bars indicate SEM of SRCs across sessions.

942 (e) Fixation break ratio as a function of previous outcome. Regression coefficient ( $\beta$ ) between  
943 percentage of trials with fixation breaks and the token number won or losses of the previous trial.

944 (f) Fixation break ratio as a function of current token asset. Regression coefficient ( $\beta$ ) between  
945 percentage of trials with fixation breaks and the start token number of the current trial.

946 Error bars indicate SEM or estimates across sessions (session number = 37 for each monkey).

947 ns, no significant, \*\*  $p < 10^{-2}$ , \*\*\*  $p < 10^{-3}$ , \*\*\*\*  $p < 10^{-4}$  (t-test or paired t-test).



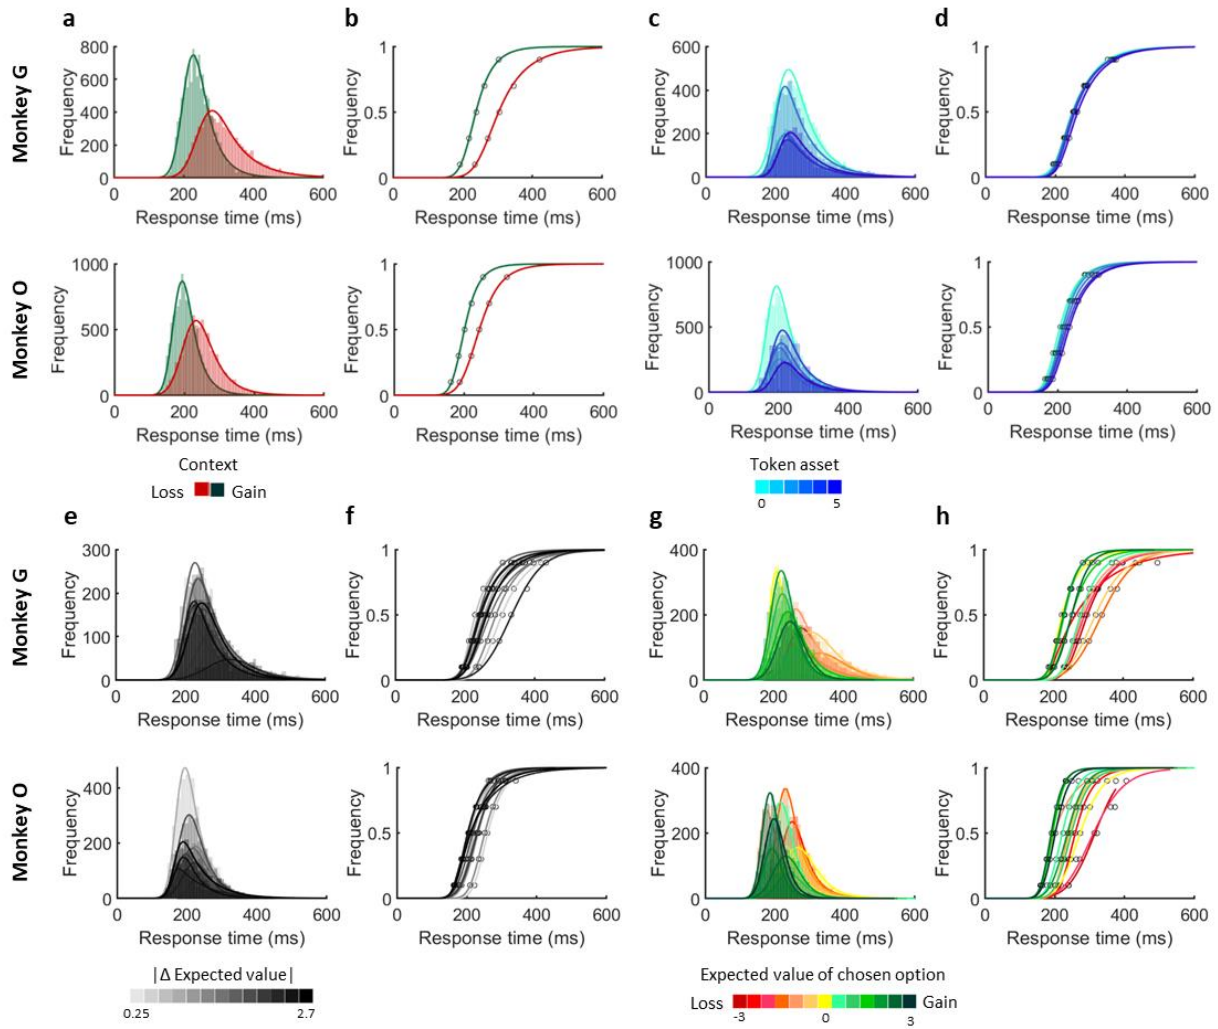

949 **Figure S3. Response time of monkey's choice.**

950 (a) Distribution of response times when monkeys made decisions in the gain (green) and loss (red)  
951 context for each monkey. Histograms with light color indicate the raw data distribution and curves with  
952 dark color indicate the best-fitting (ex-Gaussian) distribution.

953 (b) Cumulative distribution function (CDF) of response times in the gain (green) and loss (red) context.

954 (c) Distribution of response times when monkeys made decisions with different start token numbers.  
955 The color gradients from light to dark blue indicate token number from 0 to 5.

956 (d) CDF of response times with different start token numbers.

957 (e) Distribution of response times when monkeys made decisions with different absolute values of  
958 expected value difference between gamble and sure option ( $|\Delta EVgs|s$ ). The black color gradients  
959 indicate  $|\Delta EVgs|$  from small to large.

960 (f) CDF of response times with different  $|\Delta EVgs|s$ .

961 (g) Distribution of response times when monkeys made decisions with different EV of chosen option.  
962 The color gradients indicate chosen values from small to large.

963 (h) CDF of response times with different EV of chosen option.

964 One monkey took more time to make a choice when the difference expected value between options  
965 were small (Figure S3e-f; regression analysis; monkey O:  $\beta_{RT,|\Delta EVgs|} = -5.11$ ,  $p < 10^{-3}$ ), indicating a task-  
966 difficulty dependent response time. Yet another monkey showed no significant difference to this  
967 variable (Figure S3e-f; regression analysis; monkey G:  $\beta_{RT,|\Delta EVgs|} = -0.50$ ,  $p = 0.74$ ). Furthermore, Both  
968 monkeys made faster choices as the expected value of chosen option increased (Figure S3g-h; regression  
969 analysis; monkey G:  $\beta_{RT,StartTkn} = 2.83$ ,  $p = 0.19$ ; monkey O:  $\beta_{RT,StartTkn} = 3.50$ ,  $p < 10^{-2}$ ). This likely reflects an  
970 elevated motivation for high-value options.

### Monkey G

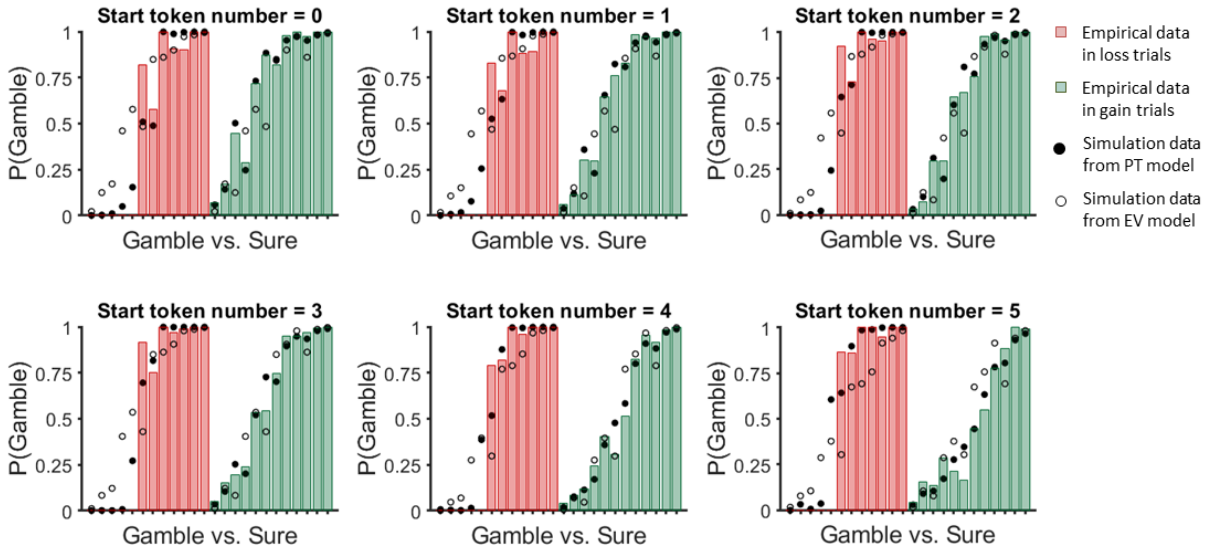

### Monkey O

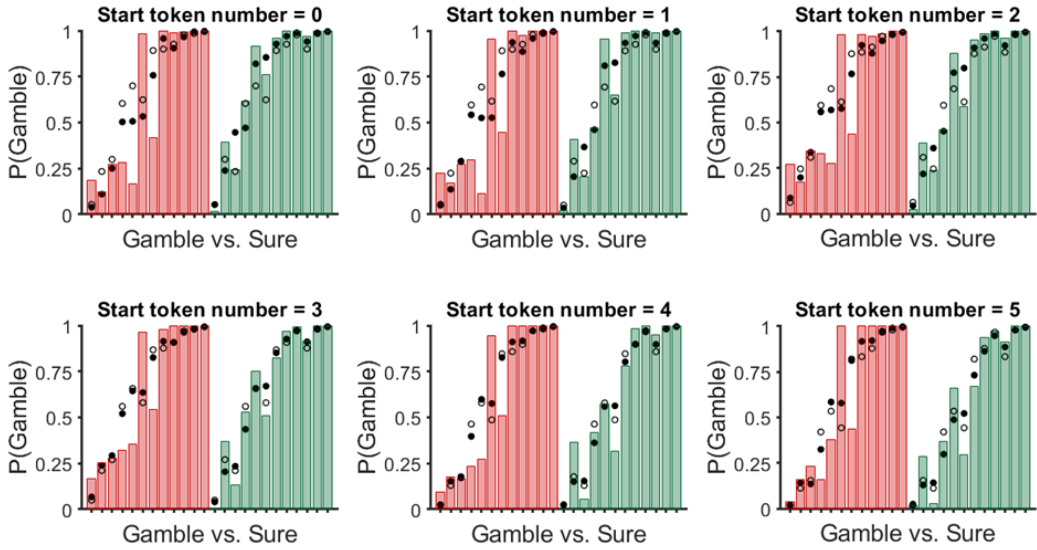

972 **Figure S4. Behavioral results and model simulations.**  
973 Probability of choosing gamble,  $P(\text{Gamble})$  for all possible choice target pairs (a gamble and a sure from  
974 gain or loss context) correspond to token asset 0-5. Colored bars represent the actual choice data and  
975 black (prospect theory model) and white (expected value model) dots represent the model simulated  
976 data. Bars are sorted according to  $\Delta EV$  ( $EV \text{ gamble} - EV \text{ sure}$ ) from small to large in loss and gain context,  
977 respectively.

### Monkey G

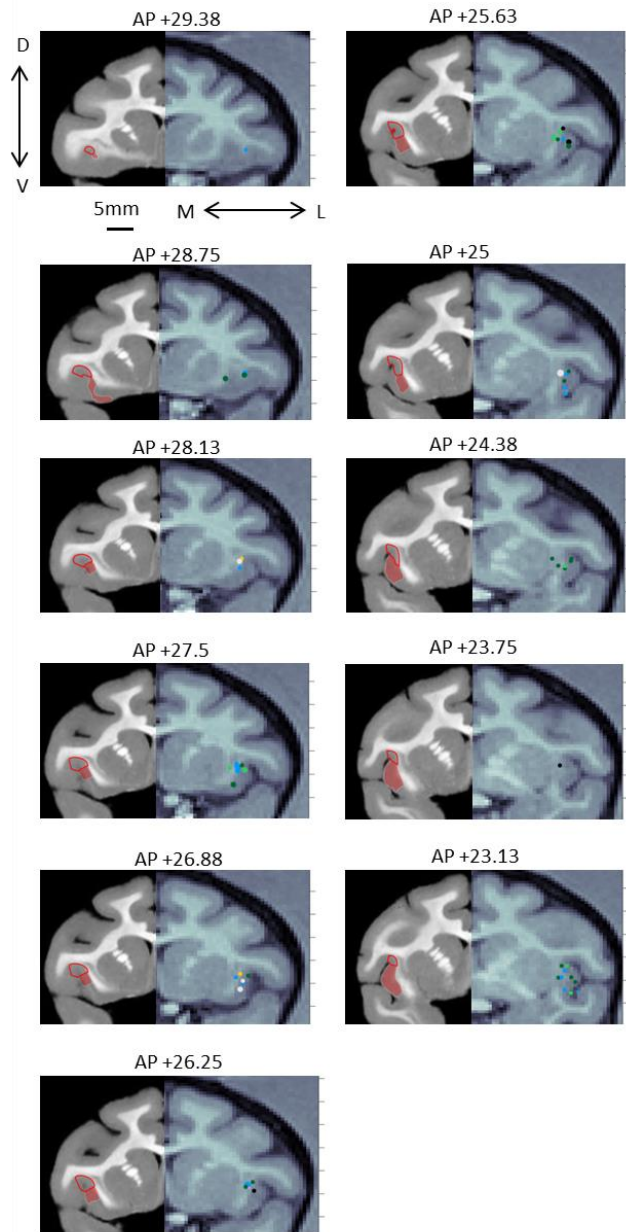

### Monkey O

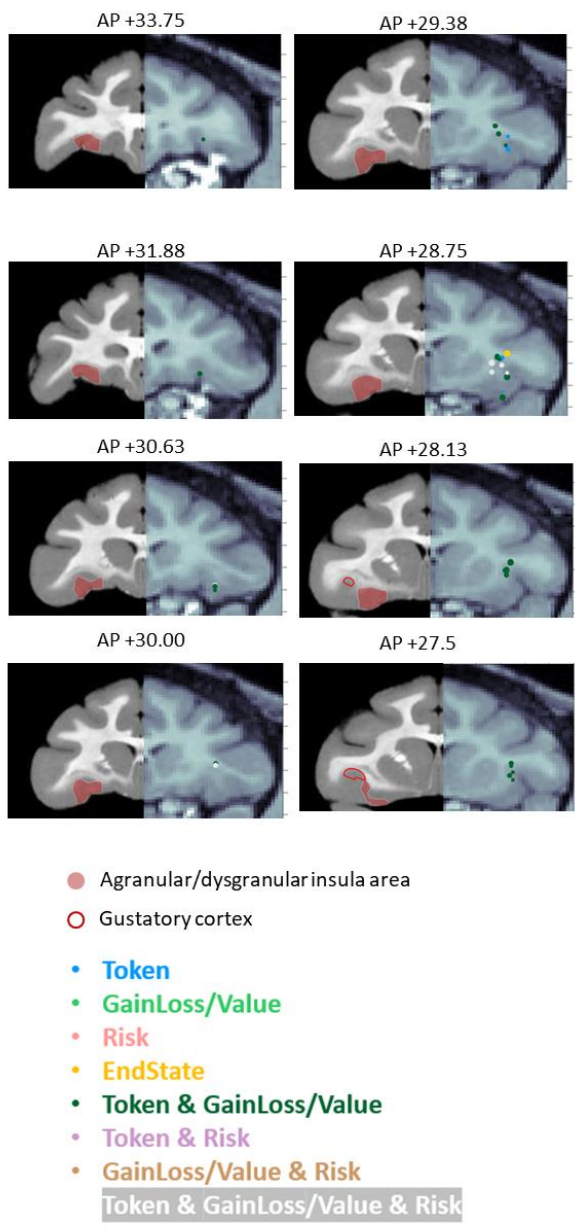

979 **Figure S5.** Recording sites with location of neurons of different functional types.  
980 Coronal MRI sections for each monkey show the locations of recorded neurons. The right side of each  
981 section shows the MRI from the anatomical scan of each monkey performed before surgery.  
982 Superimposed on each section is the estimated location of each recorded neuron based on penetration  
983 coordinates and recording depth. Neuronal classification according to the regression model is marked in  
984 different colors. The dot size indicates the number of units recorded in the location. Different colors  
985 indicate different functional signals encoded by the neurons. The position of each section in stereotactic  
986 coordinates is indicated on top. The left side of each section shows the most similar section in the  
987 macaque brain atlas of Saleem and Logothetis (2012). The location of the agranular and dysgranular  
988 insula (filled pink area), and gustatory cortex (red outlined area) are indicated in each section.  
989

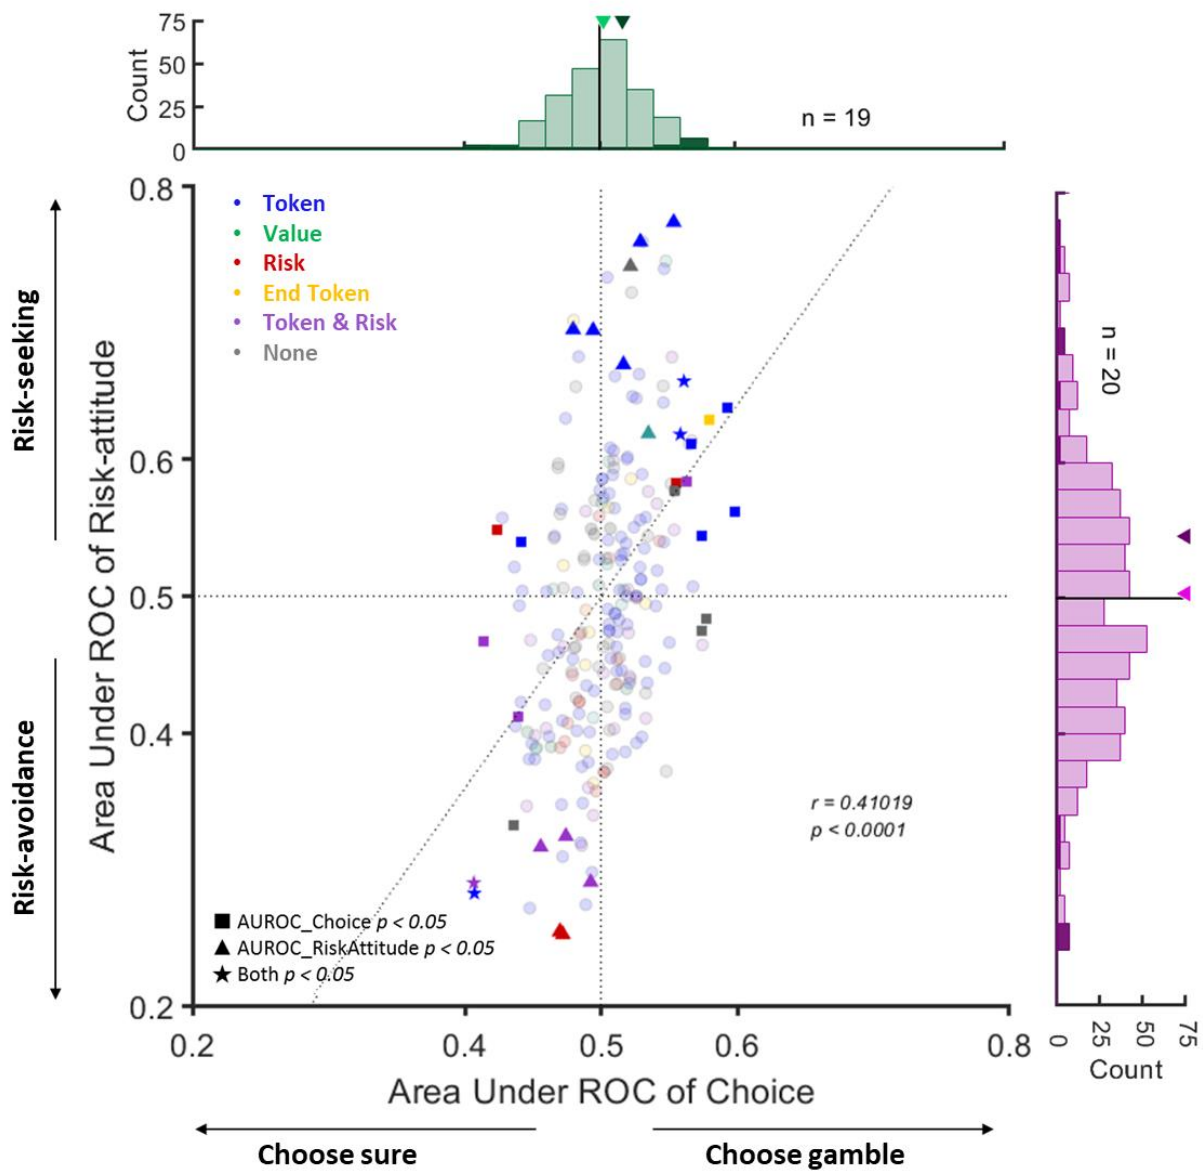

991 **Figure S6. Distribution of area under the curve (AUC) of receiver operating characteristic (ROC) for**  
992 **choice and risk-attitude in neurons encode different kind of decision-related signals.**

993 AUC values capturing the covariation of each neuron with differences in choice (choosing gamble or sure)  
994 and risk-attitude (risk-seeking or risk-avoidance). Each point represents one neuron (n = 240). Shapes  
995 indicate the significance of the two AUC values. Colors indicate the functional signal encoded by the  
996 neuron. In the marginal distributions, significant neurons are indicted in darker shades and the  
997 arrowheads indicate the average values across the entire distribution (light green or light purple) and  
998 the subset of neurons with significant AUC (dark green or dark purple), respectively. The gray vertical  
999 and horizontal dashed lines show the area of no significant discrimination ability (AUC of choice = 0.5  
1000 and AUC of risk-attitude = 0.5). The broken line represents the linear regression relating the AUC of  
1001 choice and AUC of risk-attitude ( $r$  and  $p$  values refer to the regression slope).

1002



| Gain/Loss-Value    | Gain/Loss    | Loss Value   | Gain Value | Behavioral Salience | Linear Value |         |         |           | All      |
|--------------------|--------------|--------------|------------|---------------------|--------------|---------|---------|-----------|----------|
| Monkey G (n=142)   | 4 (3%)       | 9 (6%)       | 1 (1%)     | 4 (3%)              | 3 (2%)       |         |         |           | 21 (15%) |
| Monkey O (n=98)    | 9 (9%)       | 20 (20%)     | 3 (3%)     | 9 (9%)              | 11 (11%)     |         |         |           | 52 (53%) |
| Token              | Linear Token | Binary Token | Token 0    | Token 1             | Token 2      | Token 3 | Token 4 | Token 5   | All      |
| Monkey G (n=142)   | 7 (5%)       | 9 (6%)       | 2 (1%)     | 9 (6%)              | 7 (5%)       | 6 (4%)  | 4 (3%)  | 4 (3%)    | 48 (34%) |
| Monkey O (n=98)    | 6 (6%)       | 2 (2%)       | 9 (9%)     | 7 (7%)              | 14 (14%)     | 6 (6%)  | 6 (6%)  | 4 (4%)    | 54 (55%) |
| Risk               | Linear Risk  | Binary Risk  |            |                     |              |         |         |           | All      |
| Monkey G (n=142)   | 4 (3%)       | 6 (4%)       |            |                     |              |         |         |           | 10 (7%)  |
| Monkey O (n=98)    | 5 (5%)       | 4 (4%)       |            |                     |              |         |         |           | 9 (9%)   |
| Expected End Token | End Token    |              |            |                     |              |         |         | End Token |          |
| Monkey G (n=142)   | 6 (4%)       |              |            |                     |              |         |         | 6 (4%)    |          |
| Monkey O (n=98)    | 3 (3%)       |              |            |                     |              |         |         | 3 (3%)    |          |

1003

1004 **Table S1.** Summary of the number and percentage of significant responding neurons in different subsets  
 1005 of neuron types for AIC neurons recorded from each monkey.

| Gain/Loss-Value      | Gain/Loss    | Loss Value   | Gain Value | Behavioral Salience | Linear Value |           |         |           | All      |
|----------------------|--------------|--------------|------------|---------------------|--------------|-----------|---------|-----------|----------|
| Positive correlation | 8 (62%)      | 27 (93%)     | 0 (0%)     | 0 (0%)              | 13 (93%)     |           |         |           | 48 (66%) |
| Negative correlation | 5 (38%)      | 2 (7%)       | 4 (100%)   | 13 (100%)           | 1 (7%)       |           |         |           | 25 (34%) |
| Token                | Linear Token | Binary Token | Token 0    | Token 1             | Token 2      | Token 3   | Token 4 | Token 5   | All      |
| Positive correlation | 11 (85%)     | 4 (36%)      | 0 (0%)     | 8 (50%)             | 21 (88%)     | 12 (100%) | 8 (80%) | 5 (63%)   | 69 (66%) |
| Negative correlation | 2 (15%)      | 7 (64%)      | 11 (100%)  | 8 (50%)             | 3 (12%)      | 0 (0%)    | 2 (20%) | 3 (37%)   | 36 (34%) |
| Risk                 | Linear Risk  | Binary Risk  |            |                     |              |           |         |           | All      |
| Positive correlation | 3 (33%)      | 3 (30%)      |            |                     |              |           |         |           | 6 (32%)  |
| Negative correlation | 6 (64%)      | 7 (70%)      |            |                     |              |           |         |           | 13 (68%) |
| Expected End Token   | End Token    |              |            |                     |              |           |         | End Token |          |
| Positive correlation | 5 (56%)      |              |            |                     |              |           |         | 5 (56%)   |          |
| Negative correlation | 4 (44%)      |              |            |                     |              |           |         | 4 (44%)   |          |

1006

1007 **Table S2.** Summary of the number and percentage of neurons positively or negatively correlated to  
 1008 different decision-related variables.

1009
